# Supplementary material
Source: MDPI journal article supplement (https://www.mdpi.com/2311-5637/10/4/208)
Supplement: s1 [file s1]

## **Supplementary Information**

### **Contents**

Supplementary Figures S1-S2

Supplementary Tables S1-S6

Supplementary Notes S1-S3

## Supplementary Figure S1

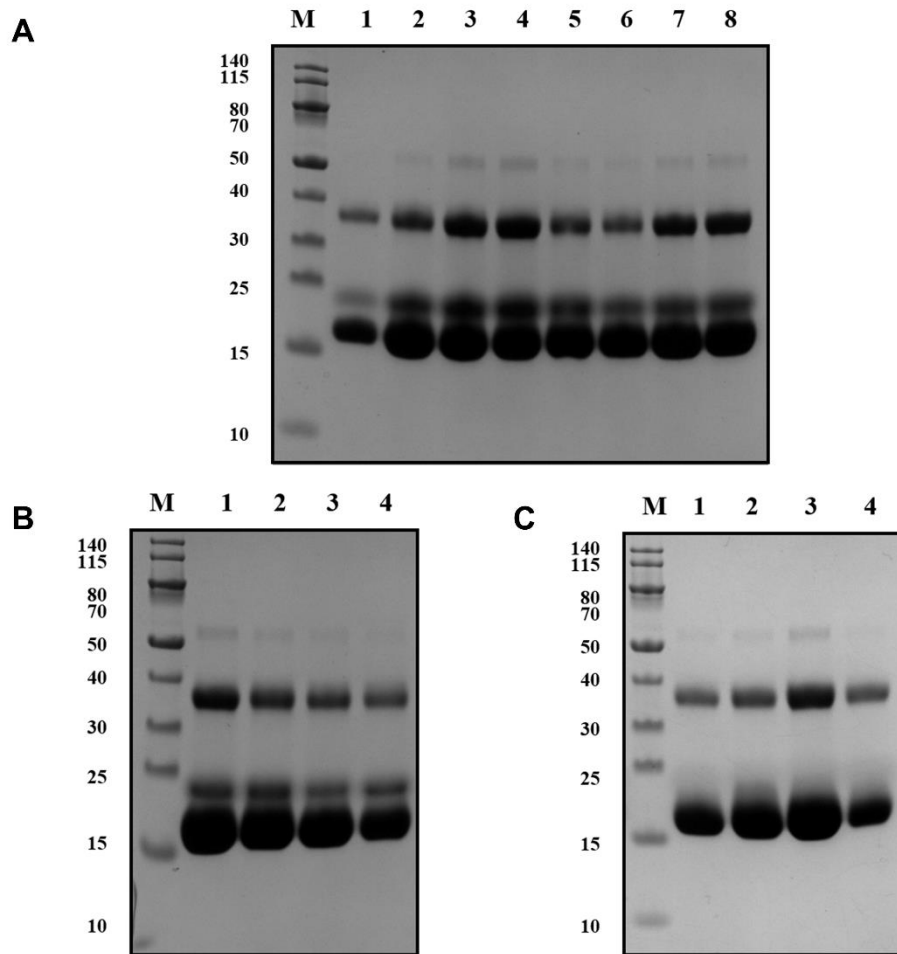

**Figure S1.** The SDS-PAGE analysis for optimization of bHB fermentation conditions at shaking-flask level. **(A)** Impact of hemin supplementation and methanol concentration on bHB expression. Lanes 1-4 (hemin supplementation): 20 mg/L, 60 mg/L, 100 mg/L, 140 mg/L; Lanes 5-8 (methanol concentration): 0.5%, 1%, 2%, 4%; **(B)** Effect of culture temperature on bHB expression. Lanes 1-4: 24°C, 27°C, 30°C, 33°C **(C)** Effect of initial pH in the medium on bHB expression. Lanes 1-4: 6.5, 6.0, 5.5, 5.0. M indicates the protein ladder.

## Supplementary Figure S2

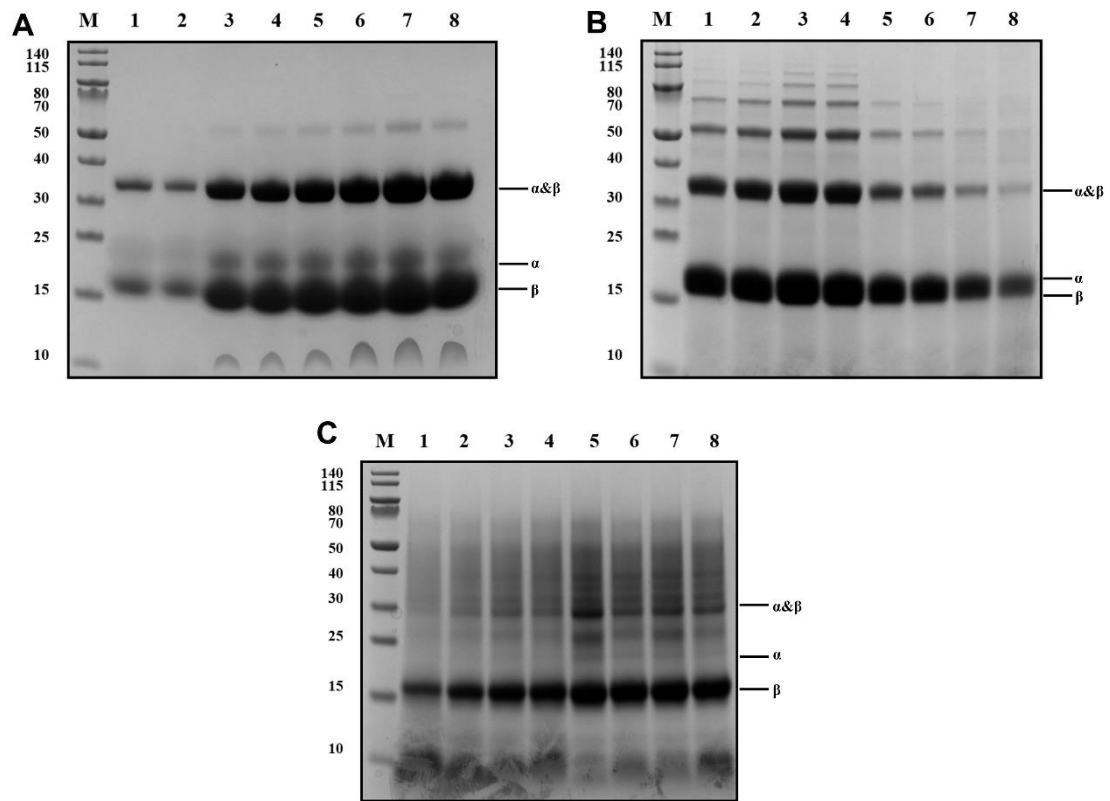

**Figure S2.** The SDS-PAGE results of purified hemoglobin samples at 5-L fermenter scale. (A) Bovine hemoglobin. (B) Human hemoglobin. (C) Porcine hemoglobin. Lanes 1-8 represent for 60 h, 72 h, 84 h, 96 h, 108 h, 120 h, 132 h, and 144 h.

# Supplementary Tables S1-S6

**Table S1 Plasmids, genes, and promoters used in this study**

| Plasmids/Genes<br>/Promoters  | Description                                                                                         | Source     |
|-------------------------------|-----------------------------------------------------------------------------------------------------|------------|
| <b>Plasmids</b>               |                                                                                                     |            |
| pPICZαA                       | <i>P. pastoris</i> inducible expression plasmid; Zeo <sup>R</sup>                                   | Invitrogen |
| pGAPZαA                       | <i>P. pastoris</i> constitutive expression plasmid; Zeo <sup>R</sup>                                | Invitrogen |
| pPICZαA-αF-LegH               | pPICZαA harboring one copy of the <i>LegH</i> gene, and α-Factor as the SP; Zeo <sup>R</sup>        | This study |
| pPICZαA-PpPIR2-LegH           | pPICZαA harboring one copy of the <i>LegH</i> gene, and PpPIR2 as the SP; Zeo <sup>R</sup>          | This study |
| pPICZαA-BGL2 -LegH            | pPICZαA harboring one copy of the <i>LegH</i> gene, and BGL2 as the SP; Zeo <sup>R</sup>            | This study |
| pPICZαA-BA75_03304T0-LegH     | pPICZαA harboring one copy of the <i>LegH</i> gene, and BA75_03304T0 as the SP; Zeo <sup>R</sup>    | This study |
| pPICZαA-MSB2 -LegH            | pPICZαA harboring one copy of the <i>LegH</i> gene, and MSB2 as the SP; Zeo <sup>R</sup>            | This study |
| pPICZαA-PP7435_Ch3-1225 -LegH | pPICZαA harboring one copy of the <i>LegH</i> gene, and PP7435_Ch3-1225 as the SP; Zeo <sup>R</sup> | This study |
| pPICZαA-FPR2-LegH             | pPICZαA harboring one copy of the <i>LegH</i> gene, and FPR2 as the SP; Zeo <sup>R</sup>            | This study |
| pPICZαA-CTS1 -LegH            | pPICZαA harboring one copy of the <i>LegH</i> gene, and CTS1 as the SP; Zeo <sup>R</sup>            | This study |
| pPICZαA-PP7435_Ch2-0752 -LegH | pPICZαA harboring one copy of the <i>LegH</i> gene, and PP7435_Ch2-0752 as the SP; Zeo <sup>R</sup> | This study |
| pPICZαA-FLO5-1-LegH           | pPICZαA harboring one copy of the <i>LegH</i> gene, and FLO5-1 as the SP; Zeo <sup>R</sup>          | This study |
| pPICZαA-SUN4-LegH             | pPICZαA harboring one copy of the <i>LegH</i> gene, and SUN4 as the SP; Zeo <sup>R</sup>            | This study |
| pPICZαA-RCE3-LegH             | pPICZαA harboring one copy of the <i>LegH</i> gene, and RCE3 as the SP; Zeo <sup>R</sup>            | This study |
| pPICZαA-SCW10-LegH            | pPICZαA harboring one copy of the <i>LegH</i> gene, and SCW10 as the SP; Zeo <sup>R</sup>           | This study |
| pPICZαA-GAS3-LegH             | pPICZαA harboring one copy of the <i>LegH</i> gene, and GAS3 as the SP; Zeo <sup>R</sup>            | This study |
| pPICZαA-FLO11-LegH            | pPICZαA harboring one copy of the <i>LegH</i> gene, and FLO11 as the SP; Zeo <sup>R</sup>           | This study |

|                               |                                                                                                      |            |
|-------------------------------|------------------------------------------------------------------------------------------------------|------------|
| pPICZαA-BA75_04148T0-LegH     | pPICZαA harboring one copy of the <i>LegH</i> gene, and BA75_04148T0 as the SP; Zeo <sup>R</sup>     | This study |
| pPICZαA-CDA2-LegH             | pPICZαA harboring one copy of the <i>LegH</i> gene, and CDA2 as the SP; Zeo <sup>R</sup>             | This study |
| pPICZαA-GAS1-1-LegH           | pPICZαA harboring one copy of the <i>LegH</i> gene, and GAS1-1 as the SP; Zeo <sup>R</sup>           | This study |
| pPICZαA-EXG1-LegH             | pPICZαA harboring one copy of the <i>LegH</i> gene, and EXG1 as the SP; Zeo <sup>R</sup>             | This study |
| pPICZαA-UTH1-LegH             | pPICZαA harboring one copy of the <i>LegH</i> gene, and UTH1 as the SP; Zeo <sup>R</sup>             | This study |
| pPICZαA-KAR2-LegH             | pPICZαA harboring one copy of the <i>LegH</i> gene, and KAR2 as the SP; Zeo <sup>R</sup>             | This study |
| pPICZαA-BA75_00070T0-LegH     | pPICZαA harboring one copy of the <i>LegH</i> gene, and BA75_00070T0 as the SP; Zeo <sup>R</sup>     | This study |
| pPICZαA-PRY2-LegH             | pPICZαA harboring one copy of the <i>LegH</i> gene, and PRY2 as the SP; Zeo <sup>R</sup>             | This study |
| pPICZαA-PDI1-LegH             | pPICZαA harboring one copy of the <i>LegH</i> gene, and PDI1 as the SP; Zeo <sup>R</sup>             | This study |
| pPICZαA-PpPIR1-LegH           | pPICZαA harboring one copy of the <i>LegH</i> gene, and PpPIR1 as the SP; Zeo <sup>R</sup>           | This study |
| pPICZαA-BA75_04419T0-LegH     | pPICZαA harboring one copy of the <i>LegH</i> gene, and BA75_04419T0 as the SP; Zeo <sup>R</sup>     | This study |
| pPICZαA-YPS1-1-LegH           | pPICZαA harboring one copy of the <i>LegH</i> gene, and YPS1-1 as the SP; Zeo <sup>R</sup>           | This study |
| pPICZαA-BA75_02630T0-LegH     | pPICZαA harboring one copy of the <i>LegH</i> gene, and BA75_02630T0 as the SP; Zeo <sup>R</sup>     | This study |
| pPICZαA-PP7435_Chr3-1213-LegH | pPICZαA harboring one copy of the <i>LegH</i> gene, and PP7435_Chr3-1213 as the SP; Zeo <sup>R</sup> | This study |
| pPICZαA-PEP4-LegH             | pPICZαA harboring one copy of the <i>LegH</i> gene, and PEP4 as the SP; Zeo <sup>R</sup>             | This study |
| pPICZαA-SCW11-LegH            | pPICZαA harboring one copy of the <i>LegH</i> gene, and SCW11 as the SP; Zeo <sup>R</sup>            | This study |
| pPICZαA-PP7435_Chr4-0690-LegH | pPICZαA harboring one copy of the <i>LegH</i> gene, and PP7435_Chr4-0690 as the SP; Zeo <sup>R</sup> | This study |
| pPICZαA-BA75_0002T0-LegH      | pPICZαA harboring one copy of the <i>LegH</i> gene, and BA75_0002T0 as the SP; Zeo <sup>R</sup>      | This study |
| pPICZαA-DSE4-LegH             | pPICZαA harboring one copy of the <i>LegH</i> gene, and DSE4 as the SP; Zeo <sup>R</sup>             | This study |
| pPICZαA-EPX1-LegH             | pPICZαA harboring one copy of the <i>LegH</i> gene, and EPX1 as the SP; Zeo <sup>R</sup>             | This study |
| pPICZαA-BA75_04741T0-LegH     | pPICZαA harboring one copy of the <i>LegH</i> gene, and BA75_04741T0 as the SP; Zeo <sup>R</sup>     | This study |

|                           |                                                                                                  |            |
|---------------------------|--------------------------------------------------------------------------------------------------|------------|
| pPICZαA-BA75_04680T0-LegH | pPICZαA harboring one copy of the <i>LegH</i> gene, and BA75_04680T0 as the SP; Zeo <sup>R</sup> | This study |
| pPICZαA-TOS1-LegH         | pPICZαA harboring one copy of the <i>LegH</i> gene, and TOS1 as the SP; Zeo <sup>R</sup>         | This study |
| pPICZαA-BA75_02525T0-LegH | pPICZαA harboring one copy of the <i>LegH</i> gene, and BA75_02525T0 as the SP; Zeo <sup>R</sup> | This study |
| pPICZαA-YMR321C-LegH      | pPICZαA harboring one copy of the <i>LegH</i> gene, and YMR321C as the SP; Zeo <sup>R</sup>      | This study |
| pPICZαA-MPD1-LegH         | pPICZαA harboring one copy of the <i>LegH</i> gene, and MPD1 as the SP; Zeo <sup>R</sup>         | This study |
| pPICZαA-CPR5-LegH         | pPICZαA harboring one copy of the <i>LegH</i> gene, and CPR5 as the SP; Zeo <sup>R</sup>         | This study |
| pPICZαA-BA75_00206T0-LegH | pPICZαA harboring one copy of the <i>LegH</i> gene, and BA75_00206T0 as the SP; Zeo <sup>R</sup> | This study |
| pPICZαA-NCR1-LegH         | pPICZαA harboring one copy of the <i>LegH</i> gene, and NCR1 as the SP; Zeo <sup>R</sup>         | This study |
| pPICZαA-BA75_01378T0-LegH | pPICZαA harboring one copy of the <i>LegH</i> gene, and BA75_01378T0 as the SP; Zeo <sup>R</sup> | This study |
| pPICZαA-BA75_04539T0-LegH | pPICZαA harboring one copy of the <i>LegH</i> gene, and BA75_04539T0 as the SP; Zeo <sup>R</sup> | This study |
| pPICZαA-BA75_01990T0-LegH | pPICZαA harboring one copy of the <i>LegH</i> gene, and BA75_01990T0 as the SP; Zeo <sup>R</sup> | This study |
| pPICZαA-BA75_02958T0-LegH | pPICZαA harboring one copy of the <i>LegH</i> gene, and BA75_02958T0 as the SP; Zeo <sup>R</sup> | This study |
| pPICZαA-BA75_02022T0-LegH | pPICZαA harboring one copy of the <i>LegH</i> gene, and BA75_02022T0 as the SP; Zeo <sup>R</sup> | This study |
| pPICZαA-BA75_01121T0-LegH | pPICZαA harboring one copy of the <i>LegH</i> gene, and BA75_01121T0 as the SP; Zeo <sup>R</sup> | This study |
| pPICZαA-ADP1-LegH         | pPICZαA harboring one copy of the <i>LegH</i> gene, and ADP1 as the SP; Zeo <sup>R</sup>         | This study |
| pPICZαA-UTR2-LegH         | pPICZαA harboring one copy of the <i>LegH</i> gene, and UTR2 as the SP; Zeo <sup>R</sup>         | This study |
| pPICZαA-YBR139W-LegH      | pPICZαA harboring one copy of the <i>LegH</i> gene, and YBR139W as the SP; Zeo <sup>R</sup>      | This study |
| pPICZαA-OST1-LegH         | pPICZαA harboring one copy of the <i>LegH</i> gene, and OST1 as the SP; Zeo <sup>R</sup>         | This study |
| pPICZαA-ERP5-LegH         | pPICZαA harboring one copy of the <i>LegH</i> gene, and ERP5 as the SP; Zeo <sup>R</sup>         | This study |

|                           |                                                                                                  |            |
|---------------------------|--------------------------------------------------------------------------------------------------|------------|
| pPICZαA-BA75_04668T0-LegH | pPICZαA harboring one copy of the <i>LegH</i> gene, and BA75_04668T0 as the SP; Zeo <sup>R</sup> | This study |
| pPICZαA-PLB3-LegH         | pPICZαA harboring one copy of the <i>LegH</i> gene, and PLB3 as the SP; Zeo <sup>R</sup>         | This study |
| pPICZαA-BA75_00184T0-LegH | pPICZαA harboring one copy of the <i>LegH</i> gene, and BA75_00184T0 as the SP; Zeo <sup>R</sup> | This study |
| pPICZαA-BA75_01365T0-LegH | pPICZαA harboring one copy of the <i>LegH</i> gene, and BA75_01365T0 as the SP; Zeo <sup>R</sup> | This study |
| pPICZαA-YKE4-LegH         | pPICZαA harboring one copy of the <i>LegH</i> gene, and YKE4 as the SP; Zeo <sup>R</sup>         | This study |
| pPICZαA-BA75_04506T0-LegH | pPICZαA harboring one copy of the <i>LegH</i> gene, and BA75_04506T0 as the SP; Zeo <sup>R</sup> | This study |
| pPICZαA-ERO1-LegH         | pPICZαA harboring one copy of the <i>LegH</i> gene, and ERO1 as the SP; Zeo <sup>R</sup>         | This study |
| pPICZαA-EMP70-LegH        | pPICZαA harboring one copy of the <i>LegH</i> gene, and EMP70 as the SP; Zeo <sup>R</sup>        | This study |
| pPICZαA-BA75_02926T0-LegH | pPICZαA harboring one copy of the <i>LegH</i> gene, and BA75_02926T0 as the SP; Zeo <sup>R</sup> | This study |
| pPICZαA-BA75_01328T0-LegH | pPICZαA harboring one copy of the <i>LegH</i> gene, and BA75_01328T0 as the SP; Zeo <sup>R</sup> | This study |
| pPICZαA-BA75_02520T0-LegH | pPICZαA harboring one copy of the <i>LegH</i> gene, and BA75_02520T0 as the SP; Zeo <sup>R</sup> | This study |
| pPICZαA-BA75_05051T0-LegH | pPICZαA harboring one copy of the <i>LegH</i> gene, and BA75_05051T0 as the SP; Zeo <sup>R</sup> | This study |
| pPICZαA-PPlase-LegH       | pPICZαA harboring one copy of the <i>LegH</i> gene, and PPlase as the SP; Zeo <sup>R</sup>       | This study |
| pPICZαA-GAS2-LegH         | pPICZαA harboring one copy of the <i>LegH</i> gene, and GAS2 as the SP; Zeo <sup>R</sup>         | This study |
| pPICZαA-αF-bHBα           | pPICZαA harboring one copy of the <i>bHBα</i> gene, and α-Factor as the SP; Zeo <sup>R</sup>     | This study |
| pPICZαA-αF-bHBβ           | pPICZαA harboring one copy of the <i>bHBβ</i> gene, and α-Factor as the SP; Zeo <sup>R</sup>     | This study |
| pPICZαA-αF-hHBα           | pPICZαA harboring one copy of the <i>hHBα</i> gene, and α-Factor as the SP; Zeo <sup>R</sup>     | This study |
| pPICZαA-αF-hHBβ           | pPICZαA harboring one copy of the <i>hHBβ</i> gene, and α-Factor as the SP; Zeo <sup>R</sup>     | This study |
| pPICZαA-αF-pHBα           | pPICZαA harboring one copy of the <i>pHBα</i> gene, and α-Factor as the SP; Zeo <sup>R</sup>     | This study |
| pPICZαA-αF-pHBβ           | pPICZαA harboring one copy of the <i>pHBβ</i> gene, and α-Factor as the SP; Zeo <sup>R</sup>     | This study |
| pGAPZαA - bAHSP           | pGAPZαA harboring one copy of the <i>bAHSP</i> gene; Zeo <sup>R</sup>                            | This study |

|                    |                                                                          |            |
|--------------------|--------------------------------------------------------------------------|------------|
| pGAPZαA -<br>hAHSP | pGAPZαA harboring one copy of the <i>hAHSP</i> gene;<br>Zeo <sup>R</sup> | This study |
| pGAPZαA -<br>pAHSP | pGAPZαA harboring one copy of the <i>pAHSP</i> gene;<br>Zeo <sup>R</sup> | This study |

### CRISPR/Cas9 plasmids & donor fragments

|                                             |                                                                                                                                  |            |
|---------------------------------------------|----------------------------------------------------------------------------------------------------------------------------------|------------|
| pPIC3.5K- <i>ku70</i> -<br>gRNA1            | gRNA-Cas9 all-in-one plasmid containing gRNA<br>targeted <i>ku70</i> ; Zeo <sup>R</sup> ; Amp <sup>R</sup>                       | [1]        |
| pPIC3.5K-<br>P <sub>FLD1</sub> UP-<br>gRNA1 | Replacement of the gRNA in pPIC3.5K- <i>Ku70</i> -<br>gRNA1 with P <sub>FLD1</sub> UP-gRNA1; Zeo <sup>R</sup> ; Amp <sup>R</sup> | [1]        |
| pPIC3.5K-<br>P <sub>TEFI</sub> UP-<br>gRNA1 | Replacement of the gRNA in pPIC3.5K- <i>Ku70</i> -<br>gRNA1 with P <sub>TEFI</sub> UP-gRNA1; Zeo <sup>R</sup> ; Amp <sup>R</sup> | [1]        |
| pPIC3.5K-<br>P <sub>GAP</sub> UP-gRNA2      | Replacement of the gRNA in pPIC3.5K- <i>Ku70</i> -<br>gRNA1 with P <sub>GAP</sub> UP-gRNA2; Zeo <sup>R</sup> ; Amp <sup>R</sup>  | [1]        |
| pPIC3.5K-<br><i>VPS10</i> -gRNA             | Replacement of the gRNA in pPIC3.5K- <i>Ku70</i> -<br>gRNA1 with <i>VPS10</i> -gRNA; Zeo <sup>R</sup> ; Amp <sup>R</sup>         | This study |
| pPIC3.5K-<br><i>VTH1</i> -gRNA              | Replacement of the gRNA in pPIC3.5K- <i>Ku70</i> -<br>gRNA1 with <i>VTH1</i> -gRNA; Zeo <sup>R</sup> ; Amp <sup>R</sup>          | This study |
| pPIC3.5K-<br><i>PEP5</i> -gRNA              | Replacement of the gRNA in pPIC3.5K- <i>Ku70</i> -<br>gRNA1 with <i>PEP5</i> -gRNA; Zeo <sup>R</sup> ; Amp <sup>R</sup>          | This study |
| pMD18-T                                     | A dedicated vector for efficient cloning of PCR<br>products; Amp <sup>R</sup>                                                    | Takara     |
| pMD18T-Fg1                                  | pMD18T harboring the gene cassette UpFg1-<br>DoFg1; Amp <sup>R</sup>                                                             | Lab stock  |
| pMD18T-Tg1                                  | pMD18T harboring the gene cassette UpTg1-<br>DoTg1; Amp <sup>R</sup>                                                             | Lab stock  |
| pMD18T-Gg2                                  | pMD18T harboring the gene cassette UpGg2-<br>DoGg2; Amp <sup>R</sup>                                                             | Lab stock  |
| pMD18T-Fg1-<br>αF-bHBα                      | pMD18T harboring the gene cassette UpFg1-P <sub>AOX1</sub> -<br>(αF-bHBα)- <i>AOX1TT</i> - DoFg1; Amp <sup>R</sup>               | This study |
| pMD18T-Fg1-<br>DSE4-bHBα                    | pMD18T harboring the gene cassette UpFg1-P <sub>AOX1</sub> -<br>(DSE4-bHBα)- <i>AOX1TT</i> - DoFg1; Amp <sup>R</sup>             | This study |
| pMD18T-Fg1-<br>SUN4-bHBα                    | pMD18T harboring the gene cassette UpFg1-P <sub>AOX1</sub> -<br>(SUN4-bHBα)- <i>AOX1TT</i> - DoFg1; Amp <sup>R</sup>             | This study |
| pMD18T-Fg1-<br>αF-hHBα                      | pMD18T harboring the gene cassette UpFg1-P <sub>AOX1</sub> -<br>(αF-hHBα)- <i>AOX1TT</i> - DoFg1; Amp <sup>R</sup>               | This study |
| pMD18T-Fg1-<br>DSE4-hHBα                    | pMD18T harboring the gene cassette UpFg1-P <sub>AOX1</sub> -<br>(DSE4-hHBα)- <i>AOX1TT</i> - DoFg1; Amp <sup>R</sup>             | This study |
| pMD18T-Fg1-<br>SUN4-hHBα                    | pMD18T harboring the gene cassette UpFg1-P <sub>AOX1</sub> -<br>(SUN4-hHBα)- <i>AOX1TT</i> - DoFg1; Amp <sup>R</sup>             | This study |
| pMD18T-Fg1-<br>αF-pHBα                      | pMD18T harboring the gene cassette UpFg1-P <sub>AOX1</sub> -<br>(αF-pHBα)- <i>AOX1TT</i> - DoFg1; Amp <sup>R</sup>               | This study |
| pMD18T-Fg1-<br>DSE4-pHBα                    | pMD18T harboring the gene cassette UpFg1-P <sub>AOX1</sub> -<br>(DSE4-pHBα)- <i>AOX1TT</i> - DoFg1; Amp <sup>R</sup>             | This study |



|                                    |                                                                                                                          |            |
|------------------------------------|--------------------------------------------------------------------------------------------------------------------------|------------|
| pMD18T-Fg1-SUN4-pHB $\alpha$       | pMD18T harboring the gene cassette UpFg1- $P_{AOXI}$ -(SUN4-pHB $\alpha$ )- <i>AOX1TT</i> -DoFg1; Amp <sup>R</sup>       | This study |
| pMD18T-Tg1- $\alpha$ F-bHB $\beta$ | pMD18T harboring the gene cassette UpTg1- $P_{AOXI}$ -( $\alpha$ F-bHB $\beta$ )- <i>AOX1TT</i> -DoTg1; Amp <sup>R</sup> | This study |
| pMD18T-Tg1-DSE4-bHB $\beta$        | pMD18T harboring the gene cassette UpTg1- $P_{AOXI}$ -(DSE4-bHB $\beta$ )- <i>AOX1TT</i> -DoTg1; Amp <sup>R</sup>        | This study |
| pMD18T-Tg1-SUN4-bHB $\beta$        | pMD18T harboring the gene cassette UpTg1- $P_{AOXI}$ -(SUN4-bHB $\beta$ )- <i>AOX1TT</i> -DoTg1; Amp <sup>R</sup>        | This study |
| pMD18T-Tg1- $\alpha$ F-hHB $\beta$ | pMD18T harboring the gene cassette UpTg1- $P_{AOXI}$ -( $\alpha$ F-hHB $\beta$ )- <i>AOX1TT</i> -DoTg1; Amp <sup>R</sup> | This study |
| pMD18T-Tg1-DSE4-hHB $\beta$        | pMD18T harboring the gene cassette UpTg1- $P_{AOXI}$ -(DSE4-hHB $\beta$ )- <i>AOX1TT</i> -DoTg1; Amp <sup>R</sup>        | This study |
| pMD18T-Tg1-SUN4-hHB $\beta$        | pMD18T harboring the gene cassette UpTg1- $P_{AOXI}$ -(SUN4-hHB $\beta$ )- <i>AOX1TT</i> -DoTg1; Amp <sup>R</sup>        | This study |
| pMD18T-Tg1- $\alpha$ F-pHB $\beta$ | pMD18T harboring the gene cassette UpTg1- $P_{AOXI}$ -( $\alpha$ F-pHB $\beta$ )- <i>AOX1TT</i> -DoTg1; Amp <sup>R</sup> | This study |
| pMD18T-Tg1-DSE4-pHB $\beta$        | pMD18T harboring the gene cassette UpTg1- $P_{AOXI}$ -(DSE4-pHB $\beta$ )- <i>AOX1TT</i> -DoTg1; Amp <sup>R</sup>        | This study |
| pMD18T-Tg1-SUN4-pHB $\beta$        | pMD18T harboring the gene cassette UpTg1- $P_{AOXI}$ -(SUN4-pHB $\beta$ )- <i>AOX1TT</i> -DoTg1; Amp <sup>R</sup>        | This study |
| pMD18T-Gg2- $\alpha$ F-bHB $\beta$ | pMD18T harboring the gene cassette UpGg2- $P_{AOXI}$ -( $\alpha$ F-bHB $\beta$ )- <i>AOX1TT</i> -DoGg2; Amp <sup>R</sup> | This study |
| pMD18T-Gg2- $\alpha$ F-hHB $\beta$ | pMD18T harboring the gene cassette UpGg2- $P_{AOXI}$ -( $\alpha$ F-hHB $\beta$ )- <i>AOX1TT</i> -DoGg2; Amp <sup>R</sup> | This study |
| pMD18T-Gg2- $\alpha$ F-pHB $\beta$ | pMD18T harboring the gene cassette UpGg2- $P_{AOXI}$ -( $\alpha$ F-pHB $\beta$ )- <i>AOX1TT</i> -DoGg2; Amp <sup>R</sup> | This study |
| pMD18T-VPS10                       | pMD18T harboring the gene cassette UpVPS10-DoVPS10; Amp <sup>R</sup>                                                     | This study |
| pMD18T-VTH1                        | pMD18T harboring the gene cassette UpVTH1-DoVTH1; Amp <sup>R</sup>                                                       | This study |
| pMD18T-PEP5                        | pMD18T harboring the gene cassette UpPEP5-UpPEP5; Amp <sup>R</sup>                                                       | This study |

## Genes

|                               |                                                                                    |            |
|-------------------------------|------------------------------------------------------------------------------------|------------|
| <i>LegH</i>                   | Codon optimization of the leghemoglobin gene (NP_001235248.2)                      | This study |
| <i>bHB<math>\alpha</math></i> | Codon optimization of the bovine hemoglobin $\alpha$ subunit gene (NP_001070890.2) | This study |
| <i>bHB<math>\beta</math></i>  | Codon optimization of the bovine hemoglobin $\beta$ subunit gene (NP_776342.1)     | This study |
| <i>hHB<math>\alpha</math></i> | Codon optimization of the human hemoglobin $\alpha$ subunit gene (NP_000508.1)     | This study |
| <i>hHB<math>\beta</math></i>  | Codon optimization of the human hemoglobin $\beta$ subunit gene (NP_000509.1)      | This study |

|                               |                                                                                                                                                                                                                                                                        |            |
|-------------------------------|------------------------------------------------------------------------------------------------------------------------------------------------------------------------------------------------------------------------------------------------------------------------|------------|
| <i>pHB<math>\alpha</math></i> | Codon optimization of the porcine hemoglobin $\alpha$ subunit gene (XP_020942625.1)                                                                                                                                                                                    | This study |
| <i>pHB<math>\beta</math></i>  | Codon optimization of the porcine hemoglobin $\beta$ subunit gene (NP_001138313.1)                                                                                                                                                                                     | This study |
| <i>bAHSP</i>                  | Codon optimization of the bovine alpha-hemoglobin stabilizing protein bAHSP gene (NP_803488.1)                                                                                                                                                                         | This study |
| <i>hAHSP</i>                  | Codon optimization of the human alpha-hemoglobin stabilizing protein hAHSP gene (NP_001305150.1)                                                                                                                                                                       | This study |
| <i>pAHSP</i>                  | Codon optimization of the porcine alpha-hemoglobin stabilizing protein pAHSP gene (XP_020942031.1)                                                                                                                                                                     | This study |
| <i>VPS10</i>                  | Vacuolar protein sorting/targeting protein 10 [ <i>Komagataella phaffii</i> (strain GS115 / ATCC 20864), <i>PAS_chr2-1_0625</i> ; <i>K. phaffii</i> (strain ATCC 76273 / CBS PP7435 / CECT 11047 / NRRL Y-11430 / Wegner 21-1), <i>PP7435_Chr2-0657</i> ]              | This study |
| <i>VTH1</i>                   | Type I transmembrane sorting receptor for multiple vacuolar hydrolases [ <i>K. phaffii</i> (strain GS115 / ATCC 20864), <i>PAS_chr3_0653</i> ; <i>K. phaffii</i> (strain ATCC 76273 / CBS PP7435 / CECT 11047 / NRRL Y-11430 / Wegner 21-1), <i>PP7435_Chr3-0547</i> ] | This study |
| <i>PEP5</i>                   | E3 ubiquitin-protein ligase [ <i>K. phaffii</i> (strain GS115 / ATCC 20864), <i>PAS_chr1-3_0306</i> ; <i>K. phaffii</i> (strain ATCC 76273 / CBS PP7435 / CECT 11047 / NRRL Y-11430 / Wegner 21-1), <i>PP7435_Chr1-0237</i> ]                                          | This study |
| <b>Promoters</b>              |                                                                                                                                                                                                                                                                        |            |
| <i>P<sub>AOXI</sub></i>       | Methanol-inducible promoter                                                                                                                                                                                                                                            | Invitrogen |
| <i>P<sub>GAP</sub></i>        | Constitutive promoter                                                                                                                                                                                                                                                  | Invitrogen |

---

Zeo<sup>R</sup>, Zeocin resistance; Amp<sup>R</sup>, Ampicillin resistance

**Table S2 Strains used in this study**

| Strains                    | Description                                                                                                                                                                                                                                                   | Source       |
|----------------------------|---------------------------------------------------------------------------------------------------------------------------------------------------------------------------------------------------------------------------------------------------------------|--------------|
| DH5α                       | <i>E. coli</i> str. K-12 F <sup>-</sup> <i>endA1 glnV44 thi-1 recA1 relA1 gyrA96 deoR nupG purB20</i> φ80 <i>dlacZ</i> ΔM15                                                                                                                                   | Lab stock    |
| P1                         | Δ ( <i>lacZYA-argF</i> ) U169 <i>hsdR17</i> ( <i>rK<sup>-</sup>mK<sup>+</sup></i> ) λ <sup>-</sup> X33 with the knockout of <i>ku70</i> and <i>ypsI-1</i> genes deleted, and the <i>MitI</i> gene integrated into the <i>P<sub>AOXI</sub></i> UP-gRNA2 locus. | Lab stock[2] |
| P1H9                       | P1H9 engineered strain was described in the reference[2].                                                                                                                                                                                                     | Lab stock[2] |
| P1- αF-LegH                | Plasmid pPICZαA- <i>P<sub>AOXI</sub></i> -αF-LegH integrated into the 5' <i>AOXI</i> locus of P1; Zeo <sup>R</sup>                                                                                                                                            | This study   |
| P1- PpPIR2-LegH            | Plasmid pPICZαA- <i>P<sub>AOXI</sub></i> - PpPIR2-LegH integrated into the 5' <i>AOXI</i> locus of P1; Zeo <sup>R</sup>                                                                                                                                       | This study   |
| P1- BGL2 -LegH             | Plasmid pPICZαA- <i>P<sub>AOXI</sub></i> -BGL2-LegH integrated into the 5' <i>AOXI</i> locus of P1; Zeo <sup>R</sup>                                                                                                                                          | This study   |
| P1- BA75_03304T0-LegH      | Plasmid pPICZαA- <i>P<sub>AOXI</sub></i> -BA75_03304T0-LegH integrated into the 5' <i>AOXI</i> locus of P1; Zeo <sup>R</sup>                                                                                                                                  | This study   |
| P1- MSB2 -LegH             | Plasmid pPICZαA- <i>P<sub>AOXI</sub></i> -MSB2-LegH integrated into the 5' <i>AOXI</i> locus of P1; Zeo <sup>R</sup>                                                                                                                                          | This study   |
| P1- PP7435_Chr3-1225 -LegH | Plasmid pPICZαA- <i>P<sub>AOXI</sub></i> -PP7435_Chr3-1225-LegH integrated into the 5' <i>AOXI</i> locus of P1; Zeo <sup>R</sup>                                                                                                                              | This study   |
| P1- FPR2 -LegH             | Plasmid pPICZαA- <i>P<sub>AOXI</sub></i> -FPR2-LegH integrated into the 5' <i>AOXI</i> locus of P1; Zeo <sup>R</sup>                                                                                                                                          | This study   |
| P1- CTS1 -LegH             | Plasmid pPICZαA- <i>P<sub>AOXI</sub></i> -CTS1-LegH integrated into the 5' <i>AOXI</i> locus of P1; Zeo <sup>R</sup>                                                                                                                                          | This study   |
| P1- PP7435_Chr2-0752 -LegH | Plasmid pPICZαA- <i>P<sub>AOXI</sub></i> -PP7435_Chr2-0752-LegH integrated into the 5' <i>AOXI</i> locus of P1; Zeo <sup>R</sup>                                                                                                                              | This study   |

| Strains                      | Description                                                                                                           | Source     |
|------------------------------|-----------------------------------------------------------------------------------------------------------------------|------------|
| P1- FLO5-1-LegH              | Plasmid pPICZαA-P <sub>AOXI</sub> -FLO5-1-LegH integrated into the 5' <i>AOXI</i> locus of P1; Zeo <sup>R</sup>       | This study |
| P1- SUN4-LegH                | Plasmid pPICZαA-P <sub>AOXI</sub> -SUN4-LegH integrated into the 5' <i>AOXI</i> locus of P1; Zeo <sup>R</sup>         | This study |
| P1- RCE3-LegH                | Plasmid pPICZαA-P <sub>AOXI</sub> -RCE3-LegH integrated into the 5' <i>AOXI</i> locus of P1; Zeo <sup>R</sup>         | This study |
| P1- SCW10-LegH               | Plasmid pPICZαA-P <sub>AOXI</sub> -SCW10-LegH integrated into the 5' <i>AOXI</i> locus of P1; Zeo <sup>R</sup>        | This study |
| P1- GAS3-LegH                | Plasmid pPICZαA-P <sub>AOXI</sub> -GAS3-LegH integrated into the 5' <i>AOXI</i> locus of P1; Zeo <sup>R</sup>         | This study |
| P1- FLO11-LegH               | Plasmid pPICZαA-P <sub>AOXI</sub> -FLO11-LegH integrated into the 5' <i>AOXI</i> locus of P1; Zeo <sup>R</sup>        | This study |
| P1-<br>BA75_04148T0-<br>LegH | Plasmid pPICZαA-P <sub>AOXI</sub> -BA75_04148T0-LegH integrated into the 5' <i>AOXI</i> locus of P1; Zeo <sup>R</sup> | This study |
| P1- CDA2-LegH                | Plasmid pPICZαA-P <sub>AOXI</sub> -CDA2-LegH integrated into the 5' <i>AOXI</i> locus of P1; Zeo <sup>R</sup>         | This study |
| P1- GAS1-1-LegH              | Plasmid pPICZαA-P <sub>AOXI</sub> -GAS1-1-LegH integrated into the 5' <i>AOXI</i> locus of P1; Zeo <sup>R</sup>       | This study |
| P1- EXG1-LegH                | Plasmid pPICZαA-P <sub>AOXI</sub> -EXG1-LegH integrated into the 5' <i>AOXI</i> locus of P1; Zeo <sup>R</sup>         | This study |
| P1- UTH1-LegH                | Plasmid pPICZαA-P <sub>AOXI</sub> -UTH1-LegH integrated into the 5' <i>AOXI</i> locus of P1; Zeo <sup>R</sup>         | This study |
| P1- KAR2-LegH                | Plasmid pPICZαA-P <sub>AOXI</sub> -KAR2-LegH integrated into the 5' <i>AOXI</i> locus of P1; Zeo <sup>R</sup>         | This study |
| P1-<br>BA75_00070T0-<br>LegH | Plasmid pPICZαA-P <sub>AOXI</sub> -BA75_00070T0-LegH integrated into the 5' <i>AOXI</i> locus of P1; Zeo <sup>R</sup> | This study |
| P1- PRY2-LegH                | Plasmid pPICZαA-P <sub>AOXI</sub> -PRY2-LegH integrated into the 5' <i>AOXI</i> locus of P1; Zeo <sup>R</sup>         | This study |
| P1- PDI1-LegH                | Plasmid pPICZαA-P <sub>AOXI</sub> -PDI1-LegH integrated into the 5' <i>AOXI</i> locus of P1; Zeo <sup>R</sup>         | This study |

| Strains                       | Description                                                                                                               | Source     |
|-------------------------------|---------------------------------------------------------------------------------------------------------------------------|------------|
| P1- PpPIR1-LegH               | Plasmid pPICZαA-P <sub>AOXI</sub> -PpPIR1-LegH integrated into the 5' <i>AOXI</i> locus of P1; Zeo <sup>R</sup>           | This study |
| P1-<br>BA75_04419T0-<br>LegH  | Plasmid pPICZαA-P <sub>AOXI</sub> -BA75_04419T0-LegH integrated into the 5' <i>AOXI</i> locus of P1; Zeo <sup>R</sup>     | This study |
| P1- YPS1-1-LegH               | Plasmid pPICZαA-P <sub>AOXI</sub> -YPS1-1-LegH integrated into the 5' <i>AOXI</i> locus of P1; Zeo <sup>R</sup>           | This study |
| P1-<br>BA75_02630T0-<br>LegH  | Plasmid pPICZαA-P <sub>AOXI</sub> -BA75_02630T0-LegH integrated into the 5' <i>AOXI</i> locus of P1; Zeo <sup>R</sup>     | This study |
| P1- PP7435_Chr3-<br>1213-LegH | Plasmid pPICZαA-P <sub>AOXI</sub> -PP7435_Chr3-1213-LegH integrated into the 5' <i>AOXI</i> locus of P1; Zeo <sup>R</sup> | This study |
| P1- PEP4-LegH                 | Plasmid pPICZαA-P <sub>AOXI</sub> -PEP4-LegH integrated into the 5' <i>AOXI</i> locus of P1; Zeo <sup>R</sup>             | This study |
| P1- SCW11-LegH                | Plasmid pPICZαA-P <sub>AOXI</sub> -SCW11-LegH integrated into the 5' <i>AOXI</i> locus of P1; Zeo <sup>R</sup>            | This study |
| P1- PP7435_Chr4-<br>0690-LegH | Plasmid pPICZαA-P <sub>AOXI</sub> -PP7435_Chr4-0690-LegH integrated into the 5' <i>AOXI</i> locus of P1; Zeo <sup>R</sup> | This study |
| P1- BA75_0002T0-<br>LegH      | Plasmid pPICZαA-P <sub>AOXI</sub> -BA75_0002T0-LegH integrated into the 5' <i>AOXI</i> locus of P1; Zeo <sup>R</sup>      | This study |
| P1- DSE4-LegH                 | Plasmid pPICZαA-P <sub>AOXI</sub> -DSE4-LegH integrated into the 5' <i>AOXI</i> locus of P1; Zeo <sup>R</sup>             | This study |
| P1- EPX1-LegH                 | Plasmid pPICZαA-P <sub>AOXI</sub> -EPX1-LegH integrated into the 5' <i>AOXI</i> locus of P1; Zeo <sup>R</sup>             | This study |
| P1-<br>BA75_04741T0-<br>LegH  | Plasmid pPICZαA-P <sub>AOXI</sub> -BA75_04741T0-LegH integrated into the 5' <i>AOXI</i> locus of P1; Zeo <sup>R</sup>     | This study |
| P1-<br>BA75_04680T0-<br>LegH  | Plasmid pPICZαA-P <sub>AOXI</sub> -BA75_04680T0-LegH integrated into the 5' <i>AOXI</i> locus of P1; Zeo <sup>R</sup>     | This study |

| Strains                      | Description                                                                                                                    | Source     |
|------------------------------|--------------------------------------------------------------------------------------------------------------------------------|------------|
| P1- TOS1-LegH                | Plasmid pPICZ $\alpha$ A-P <sub>AOXI</sub> -TOS1-LegH integrated into the 5' <i>AOXI</i> locus of P1; Zeo <sup>R</sup>         | This study |
| P1-<br>BA75_02525T0-<br>LegH | Plasmid pPICZ $\alpha$ A-P <sub>AOXI</sub> -BA75_02525T0-LegH integrated into the 5' <i>AOXI</i> locus of P1; Zeo <sup>R</sup> | This study |
| P1- YMR321C-<br>LegH         | Plasmid pPICZ $\alpha$ A-P <sub>AOXI</sub> -YMR321C-LegH integrated into the 5' <i>AOXI</i> locus of P1; Zeo <sup>R</sup>      | This study |
| P1- MPD1-LegH                | Plasmid pPICZ $\alpha$ A-P <sub>AOXI</sub> -MPD1-LegH integrated into the 5' <i>AOXI</i> locus of P1; Zeo <sup>R</sup>         | This study |
| P1- CPR5-LegH                | Plasmid pPICZ $\alpha$ A-P <sub>AOXI</sub> -CPR5-LegH integrated into the 5' <i>AOXI</i> locus of P1; Zeo <sup>R</sup>         | This study |
| P1-<br>BA75_00206T0-<br>LegH | Plasmid pPICZ $\alpha$ A-P <sub>AOXI</sub> -BA75_00206T0-LegH integrated into the 5' <i>AOXI</i> locus of P1; Zeo <sup>R</sup> | This study |
| P1- NCR1-LegH                | Plasmid pPICZ $\alpha$ A-P <sub>AOXI</sub> -NCR1-LegH integrated into the 5' <i>AOXI</i> locus of P1; Zeo <sup>R</sup>         | This study |
| P1-<br>BA75_01378T0-<br>LegH | Plasmid pPICZ $\alpha$ A-P <sub>AOXI</sub> -BA75_01378T0-LegH integrated into the 5' <i>AOXI</i> locus of P1; Zeo <sup>R</sup> | This study |
| P1-<br>BA75_04539T0-<br>LegH | Plasmid pPICZ $\alpha$ A-P <sub>AOXI</sub> -BA75_04539T0-LegH integrated into the 5' <i>AOXI</i> locus of P1; Zeo <sup>R</sup> | This study |
| P1-<br>BA75_01990T0-<br>LegH | Plasmid pPICZ $\alpha$ A-P <sub>AOXI</sub> -BA75_01990T0-LegH integrated into the 5' <i>AOXI</i> locus of P1; Zeo <sup>R</sup> | This study |
| P1-<br>BA75_02958T0-<br>LegH | Plasmid pPICZ $\alpha$ A-P <sub>AOXI</sub> -BA75_02958T0-LegH integrated into the 5' <i>AOXI</i> locus of P1; Zeo <sup>R</sup> | This study |
| P1-<br>BA75_02022T0-<br>LegH | Plasmid pPICZ $\alpha$ A-P <sub>AOXI</sub> -BA75_02022T0-LegH integrated into the 5' <i>AOXI</i> locus of P1; Zeo <sup>R</sup> | This study |

| Strains                      | Description                                                                                                                    | Source     |
|------------------------------|--------------------------------------------------------------------------------------------------------------------------------|------------|
| P1-<br>BA75_01121T0-<br>LegH | Plasmid pPICZ $\alpha$ A-P <sub>AOXI</sub> -BA75_01121T0-LegH integrated into the 5' <i>AOXI</i> locus of P1; Zeo <sup>R</sup> | This study |
| P1- ADP1-LegH                | Plasmid pPICZ $\alpha$ A-P <sub>AOXI</sub> -ADP1-LegH integrated into the 5' <i>AOXI</i> locus of P1; Zeo <sup>R</sup>         | This study |
| P1- UTR2-LegH                | Plasmid pPICZ $\alpha$ A-P <sub>AOXI</sub> -UTR2-LegH integrated into the 5' <i>AOXI</i> locus of P1; Zeo <sup>R</sup>         | This study |
| P1- YBR139W-<br>LegH         | Plasmid pPICZ $\alpha$ A-P <sub>AOXI</sub> -YBR139W-LegH integrated into the 5' <i>AOXI</i> locus of P1; Zeo <sup>R</sup>      | This study |
| P1- OST1-LegH                | Plasmid pPICZ $\alpha$ A-P <sub>AOXI</sub> -OST1-LegH integrated into the 5' <i>AOXI</i> locus of P1; Zeo <sup>R</sup>         | This study |
| P1- ERP5-LegH                | Plasmid pPICZ $\alpha$ A-P <sub>AOXI</sub> -ERP5-LegH integrated into the 5' <i>AOXI</i> locus of P1; Zeo <sup>R</sup>         | This study |
| P1-<br>BA75_04668T0-<br>LegH | Plasmid pPICZ $\alpha$ A-P <sub>AOXI</sub> -BA75_04668T0-LegH integrated into the 5' <i>AOXI</i> locus of P1; Zeo <sup>R</sup> | This study |
| P1- PLB3-LegH                | Plasmid pPICZ $\alpha$ A-P <sub>AOXI</sub> -PLB3-LegH integrated into the 5' <i>AOXI</i> locus of P1; Zeo <sup>R</sup>         | This study |
| P1-<br>BA75_00184T0-<br>LegH | Plasmid pPICZ $\alpha$ A-P <sub>AOXI</sub> -BA75_00184T0-LegH integrated into the 5' <i>AOXI</i> locus of P1; Zeo <sup>R</sup> | This study |
| P1-<br>BA75_01365T0-<br>LegH | Plasmid pPICZ $\alpha$ A-P <sub>AOXI</sub> -BA75_01365T0-LegH integrated into the 5' <i>AOXI</i> locus of P1; Zeo <sup>R</sup> | This study |
| P1- YKE4-LegH                | Plasmid pPICZ $\alpha$ A-P <sub>AOXI</sub> -YKE4-LegH integrated into the 5' <i>AOXI</i> locus of P1; Zeo <sup>R</sup>         | This study |
| P1-<br>BA75_04506T0-<br>LegH | Plasmid pPICZ $\alpha$ A-P <sub>AOXI</sub> -BA75_04506T0-LegH integrated into the 5' <i>AOXI</i> locus of P1; Zeo <sup>R</sup> | This study |
| P1- ERO1-LegH                | Plasmid pPICZ $\alpha$ A-P <sub>AOXI</sub> -ERO1-LegH integrated into the 5' <i>AOXI</i> locus of P1; Zeo <sup>R</sup>         | This study |

| Strains                      | Description                                                                                                                                                                                                                                                                                                                                               | Source     |
|------------------------------|-----------------------------------------------------------------------------------------------------------------------------------------------------------------------------------------------------------------------------------------------------------------------------------------------------------------------------------------------------------|------------|
| P1- EMP70-LegH               | Plasmid pPICZ $\alpha$ A-P <sub>AOXI</sub> -EMP70-LegH integrated into the 5' <i>AOXI</i> locus of P1; Zeo <sup>R</sup>                                                                                                                                                                                                                                   | This study |
| P1-<br>BA75_02926T0-<br>LegH | Plasmid pPICZ $\alpha$ A-P <sub>AOXI</sub> -BA75_02926T0-LegH integrated into the 5' <i>AOXI</i> locus of P1; Zeo <sup>R</sup>                                                                                                                                                                                                                            | This study |
| P1-<br>BA75_01328T0-<br>LegH | Plasmid pPICZ $\alpha$ A-P <sub>AOXI</sub> -BA75_01328T0-LegH integrated into the 5' <i>AOXI</i> locus of P1; Zeo <sup>R</sup>                                                                                                                                                                                                                            | This study |
| P1-<br>BA75_02520T0-<br>LegH | Plasmid pPICZ $\alpha$ A-P <sub>AOXI</sub> -BA75_02520T0-LegH integrated into the 5' <i>AOXI</i> locus of P1; Zeo <sup>R</sup>                                                                                                                                                                                                                            | This study |
| P1-<br>BA75_05051T0-<br>LegH | Plasmid pPICZ $\alpha$ A-P <sub>AOXI</sub> -BA75_05051T0-LegH integrated into the 5' <i>AOXI</i> locus of P1; Zeo <sup>R</sup>                                                                                                                                                                                                                            | This study |
| P1- PPase-LegH               | Plasmid pPICZ $\alpha$ A-P <sub>AOXI</sub> -PPase-LegH integrated into the 5' <i>AOXI</i> locus of P1; Zeo <sup>R</sup>                                                                                                                                                                                                                                   | This study |
| P1- GAS2-LegH                | Plasmid pPICZ $\alpha$ A-P <sub>AOXI</sub> -GAS2-LegH integrated into the 5' <i>AOXI</i> locus of P1; Zeo <sup>R</sup>                                                                                                                                                                                                                                    | This study |
| P1H9- $\alpha$ F-bHB         | P1H9 (X33- <i>Aku70-Mit1-Ayps1</i> -HEME-9) derived strain, gene UpFg1-P <sub>AOXI</sub> -( $\alpha$ F-bHB $\alpha$ )- <i>AOX1TT</i> -DoFg1 integrated into the P <sub>FLDI</sub> UP-gRNA1 locus of P1H9; and gene UpGg2-P <sub>AOXI</sub> -( $\alpha$ F-bHB $\beta$ )- <i>AOX1TT</i> -DoGg2 integrated into the P <sub>GAP</sub> UP-gRNA2 locus of P1H9. | This study |
| P1H9- $\alpha$ F-hHB         | P1H9 (X33- <i>Aku70-Mit1-Ayps1</i> -HEME-9) derived strain, gene UpFg1-P <sub>AOXI</sub> -( $\alpha$ F-hHB $\alpha$ )- <i>AOX1TT</i> -DoFg1 integrated into the P <sub>FLDI</sub> UP-gRNA1 locus of P1H9; and gene UpGg2-P <sub>AOXI</sub> -( $\alpha$ F-hHB $\beta$ )- <i>AOX1TT</i> -DoGg2 integrated into the P <sub>GAP</sub> UP-gRNA2 locus of P1H9. | This study |



| Strains                           | Description                                                                                                                                                                                                                                                                                                                       | Source     |
|-----------------------------------|-----------------------------------------------------------------------------------------------------------------------------------------------------------------------------------------------------------------------------------------------------------------------------------------------------------------------------------|------------|
| P1H9- $\alpha$ F-pHB              | P1H9 (X33- <i>Δku70-Mit1-Δyps1</i> -HEME-9) derived strain, gene UpFg1- $P_{AOXI}$ -( $\alpha$ F-pHB $\alpha$ )- <i>AOX1TT</i> -DoFg1 integrated into the $P_{FLDI}$ UP-gRNA1 locus of P1H9; and gene UpGg2- $P_{AOXI}$ - ( $\alpha$ F-pHB $\beta$ )- <i>AOX1TT</i> - DoGg2 integrated into the $P_{GAP}$ UP-gRNA2 locus of P1H9. | This study |
| P1- $\alpha$ F-bHB<br>(Named P1b) | P1(X33- <i>Δku70-Mit1-Δyps1</i> ) derived strain, gene UpFg1- $P_{AOXI}$ -( $\alpha$ F-bHB $\alpha$ )- <i>AOX1TT</i> - DoFg1 integrated into the $P_{FLDI}$ UP-gRNA1 locus of P1; and gene UpTg1- $P_{AOXI}$ - ( $\alpha$ F-bHB $\beta$ )- <i>AOX1TT</i> -DoTg1 integrated into the $P_{TEFI}$ UP-gRNA1 locus of P1.              | This study |
| P1-DSE4-bHB                       | P1(X33- <i>Δku70-Mit1-Δyps1</i> ) derived strain, the gene UpFg1- $P_{AOXI}$ -(DSE4-bHB $\alpha$ )- <i>AOX1TT</i> -DoFg1 integrated into the $P_{FLDI}$ UP-gRNA1 locus of P1; and the gene UpTg1- $P_{AOXI}$ - (DSE4-bHB $\beta$ )- <i>AOX1TT</i> - DoTg1 integrated into the $P_{TEFI}$ UP-gRNA1 locus of P1.                    | This study |
| P1-SUN4-bHB                       | P1(X33- <i>Δku70-Mit1-Δyps1</i> ) derived strain, the gene UpFg1- $P_{AOXI}$ -(SUN4-bHB $\alpha$ )- <i>AOX1TT</i> -DoFg1 integrated into the $P_{FLDI}$ UP-gRNA1 locus of P1; and the gene UpTg1- $P_{AOXI}$ - (SUN4-bHB $\beta$ )- <i>AOX1TT</i> - DoTg1 integrated into the $P_{TEFI}$ UP-gRNA1 locus of P1.                    | This study |
| P1- $\alpha$ F-hHB<br>(Named P1h) | P1(X33- <i>Δku70-Mit1-Δyps1</i> ) derived strain, gene UpFg1- $P_{AOXI}$ -( $\alpha$ F-hHB $\alpha$ )- <i>AOX1TT</i> - DoFg1 integrated into the $P_{FLDI}$ UP-gRNA1 locus of P1; and gene UpTg1- $P_{AOXI}$ - ( $\alpha$ F-hHB $\beta$ )- <i>AOX1TT</i> -DoTg1 integrated into the $P_{TEFI}$ UP-gRNA1 locus of P1.              | This study |

| Strains                    | Description                                                                                                                                                                                                                                                                                                                                     | Source     |
|----------------------------|-------------------------------------------------------------------------------------------------------------------------------------------------------------------------------------------------------------------------------------------------------------------------------------------------------------------------------------------------|------------|
| P1-DSE4-hHB                | P1(X33- <i>Δku70-Mit1-Δyps1</i> ) derived strain, gene UpFg1-P <sub>AOXI</sub> -(DSE4-hHB $\alpha$ )- <i>AOX1TT</i> - DoFg1 integrated into the P <sub>FLDI</sub> UP-gRNA1 locus of P1; and gene UpTg1-P <sub>AOXI</sub> - (DSE4-hHB $\beta$ )- <i>AOX1TT</i> - DoTg1 integrated into the P <sub>TEFI</sub> UP-gRNA1 locus of P1.               | This study |
| P1-SUN4-hHB                | P1(X33- <i>Δku70-Mit1-Δyps1</i> ) derived strain, gene UpFg1-P <sub>AOXI</sub> -( SUN4-hHB $\alpha$ )- <i>AOX1TT</i> - DoFg1 integrated into the P <sub>FLDI</sub> UP-gRNA1 locus of P1; and gene UpTg1-P <sub>AOXI</sub> - (SUN4-hHB $\beta$ )- <i>AOX1TT</i> - DoTg1 integrated into the P <sub>TEFI</sub> UP-gRNA1 locus of P1.              | This study |
| P1- $\alpha$ F -pHB        | P1(X33- <i>Δku70-Mit1-Δyps1</i> ) derived strain, gene UpFg1-P <sub>AOXI</sub> -( $\alpha$ F-pHB $\alpha$ )- <i>AOX1TT</i> - DoFg1 integrated into the P <sub>FLDI</sub> UP-gRNA1 locus of P1; and gene UpTg1-P <sub>AOXI</sub> - ( $\alpha$ F-pHB $\beta$ )- <i>AOX1TT</i> - DoTg1 integrated into the P <sub>TEFI</sub> UP-gRNA1 locus of P1. | This study |
| P1-DSE4-pHB<br>(Named P1p) | P1(X33- <i>Δku70-Mit1-Δyps1</i> ) derived strain, gene UpFg1-P <sub>AOXI</sub> -(DSE4-pHB $\alpha$ )- <i>AOX1TT</i> - DoFg1 integrated into the P <sub>FLDI</sub> UP-gRNA1 locus of P1; and gene UpTg1-P <sub>AOXI</sub> - (DSE4-pHB $\beta$ )- <i>AOX1TT</i> - DoTg1 integrated into the P <sub>TEFI</sub> UP-gRNA1 locus of P1.               | This study |
| P1-SUN4-pHB                | P1(X33- <i>Δku70-Mit1-Δyps1</i> ) derived strain, gene UpFg1-P <sub>AOXI</sub> -( SUN4-pHB $\alpha$ )- <i>AOX1TT</i> - DoFg1 integrated into the P <sub>FLDI</sub> UP-gRNA1 locus of P1; and gene UpTg1-P <sub>AOXI</sub> - (SUN4-pHB $\beta$ )- <i>AOX1TT</i> - DoTg1 integrated into the P <sub>TEFI</sub> UP-gRNA1 locus of P1.              | This study |

| Strains                                                                                                    | Description                                                                                                         | Source     |
|------------------------------------------------------------------------------------------------------------|---------------------------------------------------------------------------------------------------------------------|------------|
| P1- <i>bAHSP</i> - $\alpha$ F-bHB (Named P1b- <i>bAHSP</i> )                                               | Plasmid pGAPZA- <i>bAHSP</i> integrated into the <i>5'GAP</i> locus of P1b; Zeo <sup>R</sup>                        | This study |
| P1- <i>hAHSP</i> - $\alpha$ F-hHB (Named P1h- <i>hAHSP</i> )                                               | Plasmid pGAPZA- <i>hAHSP</i> integrated into the <i>5'GAP</i> locus of P1h; Zeo <sup>R</sup>                        | This study |
| P1- <i>pAHSP</i> -DSE4-pHB (Named P1p- <i>pAHSP</i> )                                                      | Plasmid pGAPZA- <i>pAHSP</i> integrated into the <i>5'GAP</i> locus of P1p; Zeo <sup>R</sup>                        | This study |
| P1b- $\Delta$ <i>VPS10</i>                                                                                 | P1b derived strain with the <i>VPS10</i> gene deleted                                                               | This study |
| P1b- $\Delta$ <i>VTH1</i>                                                                                  | P1b derived strain with the <i>VTH1</i> gene deleted                                                                | This study |
| P1b- $\Delta$ <i>PEP5</i>                                                                                  | P1b derived strain with the <i>PEP5</i> gene deleted                                                                | This study |
| P1h- $\Delta$ <i>VPS10</i>                                                                                 | P1h derived strain with the <i>VPS10</i> gene deleted                                                               | This study |
| P1h- $\Delta$ <i>VTH1</i>                                                                                  | P1h derived strain with the <i>VTH1</i> gene deleted                                                                | This study |
| P1h- $\Delta$ <i>PEP5</i>                                                                                  | P1h derived strain with the <i>PEP5</i> gene deleted                                                                | This study |
| P1p- $\Delta$ <i>VPS10</i>                                                                                 | P1p derived strain with the <i>VPS10</i> gene deleted                                                               | This study |
| P1p- $\Delta$ <i>VTH1</i>                                                                                  | P1p derived strain with the <i>VTH1</i> gene deleted                                                                | This study |
| P1p- $\Delta$ <i>PEP5</i>                                                                                  | P1p derived strain with the <i>PEP5</i> gene deleted                                                                | This study |
| P1- $\Delta$ <i>Vth1</i> - <i>bAHSP</i> - $\alpha$ F-bHB (Named P1b- $\Delta$ <i>Vth1</i> - <i>bAHSP</i> ) | Plasmid pGAPZA- <i>bAHSP</i> integrated into the <i>5'GAP</i> locus of P1b- $\Delta$ <i>Vth1</i> ; Zeo <sup>R</sup> | This study |
| P1- $\Delta$ <i>Vth1</i> - <i>hAHSP</i> - $\alpha$ F-hHB (Named P1h- $\Delta$ <i>Vth1</i> - <i>hAHSP</i> ) | Plasmid pGAPZA- <i>hAHSP</i> integrated into the <i>5'GAP</i> locus of P1h- $\Delta$ <i>Vth1</i> ; Zeo <sup>R</sup> | This study |
| P1- $\Delta$ <i>Vth1</i> - <i>pAHSP</i> -DSE4-pHB (Named P1p- $\Delta$ <i>Vth1</i> - <i>pAHSP</i> )        | Plasmid pGAPZA- <i>pAHSP</i> integrated into the <i>5'GAP</i> locus of P1p- $\Delta$ <i>Vth1</i> ; Zeo <sup>R</sup> | This study |

**Table S3 Gene knock-in/out cassettes used in this study**

| <b>Description</b>        | <b>Cassettes</b>                                                                 | <b>Locus</b>                                  |
|---------------------------|----------------------------------------------------------------------------------|-----------------------------------------------|
| Expression of <i>bHBα</i> | UpFg1- <i>P<sub>AOXI</sub></i> -(αF- <i>bHBα</i> )- <i>AOX1TT</i> -<br>DoFg1     |                                               |
|                           | UpFg1- <i>P<sub>AOXI</sub></i> -(DSE4- <i>bHBα</i> )-<br><i>AOX1TT</i> - DoFg1   |                                               |
|                           | UpFg1- <i>P<sub>AOXI</sub></i> -(SUN4- <i>bHBα</i> )-<br><i>AOX1TT</i> - DoFg1   |                                               |
|                           | UpFg1- <i>P<sub>AOXI</sub></i> -(αF- <i>hHBα</i> )- <i>AOX1TT</i> -<br>DoFg1     |                                               |
| Expression of <i>hHBα</i> | UpFg1- <i>P<sub>AOXI</sub></i> -(DSE4- <i>hHBα</i> )-<br><i>AOX1TT</i> - DoFg1   | <i>P<sub>FLD1</sub></i> UP-gRNA1<br>(P1&P1H9) |
|                           | UpFg1- <i>P<sub>AOXI</sub></i> -(SUN4- <i>hHBα</i> )-<br><i>AOX1TT</i> - DoFg1   |                                               |
|                           | UpFg1- <i>P<sub>AOXI</sub></i> -(αF- <i>pHBα</i> )- <i>AOX1TT</i> -<br>DoFg1     |                                               |
|                           | UpFg1- <i>P<sub>AOXI</sub></i> -( DSE4- <i>pHBα</i> )-<br><i>AOX1TT</i> - DoFg1  |                                               |
| Expression of <i>pHBα</i> | UpFg1- <i>P<sub>AOXI</sub></i> -( SUN4- <i>pHBα</i> )-<br><i>AOX1TT</i> - DoFg1  |                                               |
|                           | UpTg1- <i>P<sub>AOXI</sub></i> - (αF - <i>bHBβ</i> )-<br><i>AOX1TT</i> - DoTg1   |                                               |
|                           | UpTg1- <i>P<sub>AOXI</sub></i> - (DSE4 - <i>bHBβ</i> )-<br><i>AOX1TT</i> - DoTg1 |                                               |
|                           | UpTg1- <i>P<sub>AOXI</sub></i> - (SUN4 - <i>bHBβ</i> )-<br><i>AOX1TT</i> - DoTg1 |                                               |
| Expression of <i>bHBβ</i> | UpTg1- <i>P<sub>AOXI</sub></i> - (αF - <i>hHBβ</i> )-<br><i>AOX1TT</i> - DoTg1   | <i>P<sub>TEF1</sub></i> UP-gRNA1<br>(P1)      |
|                           | UpTg1- <i>P<sub>AOXI</sub></i> - (DSE4 - <i>hHBβ</i> )-<br><i>AOX1TT</i> - DoTg1 |                                               |
|                           | UpTg1- <i>P<sub>AOXI</sub></i> - (SUN4 - <i>hHBβ</i> )-<br><i>AOX1TT</i> - DoTg1 |                                               |
|                           | UpTg1- <i>P<sub>AOXI</sub></i> - (αF - <i>pHBβ</i> )-<br><i>AOX1TT</i> - DoTg1   |                                               |
| Expression of <i>hHBβ</i> | UpTg1- <i>P<sub>AOXI</sub></i> - (DSE4 - <i>pHBβ</i> )-<br><i>AOX1TT</i> - DoTg1 |                                               |
|                           | UpTg1- <i>P<sub>AOXI</sub></i> - (SUN4 - <i>pHBβ</i> )-<br><i>AOX1TT</i> - DoTg1 |                                               |
|                           | UpGg2- <i>P<sub>AOXI</sub></i> - (αF- <i>bHBβ</i> )- <i>AOX1TT</i> -<br>DoGg2    |                                               |
|                           | UpGg2- <i>P<sub>AOXI</sub></i> - (αF- <i>hHBβ</i> )- <i>AOX1TT</i> -<br>DoGg2    |                                               |
| Expression of <i>pHBβ</i> | UpGg2- <i>P<sub>AOXI</sub></i> - (αF- <i>hHBβ</i> )- <i>AOX1TT</i> -<br>DoGg2    | <i>P<sub>GAP</sub></i> UP-gRNA2<br>(PIH9)     |
| Knockout of <i>VPS10</i>  | UVPS10-DoVPS10                                                                   | <i>VPS10</i> -gRNA                            |
| Knockout of <i>VTH1</i>   | UpVTH1-DoVTH1                                                                    | <i>VTH1</i> -gRNA                             |
| Knockout of <i>PEP5</i>   | UpPEP5-DoPEP5                                                                    | <i>PEP5</i> -gRNA                             |

**Table S4 sgRNA sequences used in this study**

| <b>Target sites</b>        | <b>Guide sequence (5'-3') <sup>a</sup></b> |
|----------------------------|--------------------------------------------|
| P <sub>FLD1</sub> UP-gRNA1 | GCGGCAGTAATTGATATCGT <u>AGG</u>            |
| P <sub>TEF1</sub> UP-gRNA1 | GCAAGATGGTTAAAAGGTGA <u>AGG</u>            |
| P <sub>GAP</sub> UP-gRNA2  | TTTAAAGATTTCATCTTGAT <u>GG</u>             |
| <i>VPS10</i> -gRNA         | GTGTACGTGTCTCATAACGG <u>GGG</u>            |
| <i>VTH1</i> -gRNA          | GTACCCAGTATTCAACAGGAC <u>G</u> G           |
| <i>PEP5</i> -gRNA          | ATTAACCGAAACCTCAACGT <u>CGG</u>            |

<sup>a</sup> PAMs are underlined.

**Table S5 Primers used in this study**

| <b>Primer</b>    | <b>Sequence (5'-3')</b>                                         |
|------------------|-----------------------------------------------------------------|
| LegH-F1          | CGAGAAAAGAGAGGGCTGAAGCTCATCACCATCACCATCA<br>CATGGGTGCTTTTACTG   |
| common-XhoI-F2   | GCTAAAGAAGAAGGGGTATCTCTCGAGAAAAGAGAGGGCT<br>GAAGCTCATC          |
| LegH-R           | TCTAGAAAGCTGGCGGCCGCCGCGGTTAAAAAGCTTTCTT<br>AATAGCTGCAGCTAATTCA |
| bHB $\alpha$ -F1 | CGAGAAAAGAGAGGGCTGAAGCTCATCACCATCACCATCA<br>CGTTTTATCTGCTGCAG   |
| bHB $\alpha$ -R  | TCTAGAAAGCTGGCGGCCGCCGCGGTTATCTATATTTTGAT<br>GTCAAAACAGTAGAAACG |
| bHB $\beta$ -F   | TCTCGAGAAAAGAGAGGGCTGAAGCTCATCACCATCACCA<br>TCACTTAACTGCAGAAG   |
| bHB $\beta$ -R   | TTCTAGAAAGCTGGCGGCCGCCGCGGTTAATGGTATCTAT<br>GAGCTAATGCATTAGCAAC |
| hHB $\alpha$ -F  | CGAGAAAAGAGAGGGCTGAAGCTCATCACCATCACCATCA<br>CGTTTTGTCTCCAGCTG   |
| hHB $\alpha$ -R  | TCTAGAAAGCTGGCGGCCGCCGCGGTTATCTGTACTTAGA<br>TGTCAAAACAGTTGAAAC  |
| hHB $\beta$ -F1  | CGAGAAAAGAGAGGGCTGAAGCTCATCACCATCACCATCA<br>CGTTCATTTGACTCCAG   |
| hHB $\beta$ -R   | TCTAGAAAGCTGGCGGCCGCCGCGGTTAATGGTATTTATG<br>AGCTAATGCATTAGCAAC  |
| pHB $\alpha$ -F1 | CGAGAAAAGAGAGGGCTGAAGCTCATCACCATCACCATCA<br>CGTTTTATCTGCTGCAG   |
| pHB $\alpha$ -R  | TCTAGAAAGCTGGCGGCCGCCGCGGTTATCTGTACTTTGA<br>TGTCAAAACAGTAGAAACG |
| pHB $\beta$ -F1  | CTCGAGAAAAGAGAGGGCTGAAGCTCATCACCATCACCAT<br>CACGTTCAATTTGTCTGC  |
| pHB $\beta$ -R   | TCTAGAAAGCTGGCGGCCGCCGCGGTTAATGGTATTTATG<br>AGCTAATGCATTAGCAAC  |

| Primer                  | Sequence (5'-3')                                                 |
|-------------------------|------------------------------------------------------------------|
| BA75_00002T0<br>-F      | TTGGAGCGTTAGCCTTACTAAACTCGTCTTGGAATGGGT<br>GCTTTTACTGAAAAAC      |
| BA75_00002T0<br>-R      | GTAAGGCTAACGCTCCAAGCTAGCAACAATAAAAAATTCA<br>TCGTTTTCGAATAATTAGT  |
| BA75_01931T0<br>/SUN4-F | AGCCTGCGCTGTTACTCTAGCTGGTCTTGCAATTGCTATGG<br>GTGCTTTTACTGAAAAAC  |
| BA75_01931T0<br>/SUN4-R | CTAGAGTAACAGCGCAGGCTGTAAGAGCGGATATCTTCAT<br>CGTTTCGAATAATTAGTTG  |
| PP7435_CHR2-<br>0752-F  | TTCCGCTTTGCTTTCAGTTTTGTCCGTCGCCTTGGCCATGG<br>GTGCTTTTACTGAAAAAC  |
| PP7435_CHR2-<br>0752-R  | CAAAACTGAAAGCAAAGCGGAAATTTTCAAGTAAGACAT<br>CGTTTCGAATAATTAGTTGT  |
| CTS1-F                  | GCGGGGTTTCATATCTCTGTTACAGCTGATATTCGCCATGGG<br>TGCTTTTACTGAAAAAC  |
| CTS1-R                  | TAACAGAGATATGAACCCCGCAAAGTAAAAAAATTTTCATC<br>GTTTCGAATAATTAGTTGT |
| DSE4-F1                 | TGTTGACCAATATAGTCAGTGGAATGGGTGCTTTTACTGA<br>AAAACAAGAAGC         |
| DSE4-F2                 | TCCAACGTGCCACAACCTTTTCTTGTTGTTGGTTCTGTTGA<br>CCAATATAGTCAGTGGAAT |
| DSE4-R                  | GAAAAGTTGTGGCACGTTGGAAGAGAATGACATCGTTTC<br>GAATAATTAGTTGTTTTTTG  |
| EXG1-F                  | CGGTGGATGGCTGGTTTTGGAGCCCTATATCACCATGGGT<br>GCTTTTACTGAAAAACAAG  |
| EXG1-R                  | CAAAACCAGCCATCCACCGAGGTTGACACCCATCGTTTCG<br>AATAATTAGTTGTTTTTTG  |
| FLO5-1-F1               | ACTGCAGCTATTTTGTGTCCTTGGTGTACATGGAATGGGT<br>GCTTTTACTGAAAAACAAG  |
| FLO5-1-F2               | AAGAGTAAATTTGTGGTTTCGTTTCTGCTTTTACTGCAGCT<br>ATTTTGTGTCCTTGGTGT  |
| FLO5-1-R                | AAACGAAACCACAAATTTACTCTTCTCAAACATCGTTTCG<br>AATAATTAGTTGTTTTTTG  |

| Primer       | Sequence (5'-3')                                                |
|--------------|-----------------------------------------------------------------|
| BA75_03304T0 | TGCTTAGCACAGTGAATGTGCTGGCTATGGGTGCTTTTAC                        |
| -F1          | TGAAAAACAAGAAGC                                                 |
| BA75_03304T0 | GTTACAGCTGCAATCTTTCATATTTTCTTGCTTAGCACAG                        |
| -F2          | TGAATGTGCTGGCT                                                  |
| BA75_03304T0 | AAAATATGAAAGATTGCAGCTGTAACCTCATCGTTTCGAA                        |
| -R           | TAATTAGTTGTTTTTTGAT                                             |
| BGL2-F       | GGCTGCGGTTGCAATCTCCATTTCACAAGTGTCTGCAATG<br>GGTGCTTTTACTGAAAAAC |
| BGL2-R       | GATTGCAACCGCAGCCAGTGTTTTAAGATTAAAGATCATC<br>GTTTCGAATAATTAGTTGT |
| EPX1-F1      | CAGCAGCTTCCGCCGTTGTCTCAGCTATGGGTGCTTTTAC<br>TGAAAAACAAGAAGC     |
| EPX1-F2      | CTCTCCACCAATTTGATTCTAGCTATTGCAGCAGCTTCCGC<br>CGTTGT             |
| EPX1-R       | TAGCTAGAATCAAATTGGTGGAGAGCTTCATCGTTTCGAA<br>TAATTAGTTGTTTTTTG   |
| GAS1-1-F     | GTTAATAGGATCCTGCCTATTGAGTTCAGTCTTGGCAATGG<br>GTGCTTTTACTGAAAAAC |
| GAS1-1-R     | AGGCAGGATCCTATTAACATGCACAGAGATTAAACATCG<br>TTTCGAATAATTAGTTGT   |
| KAR2-F1      | GTAGTGCCATTTGCTAAACCTGTTAGAGCTATGGGTGCTTT<br>TACTGAAAAACAAG     |
| KAR2-F2      | GCATTAATGTATGCCATGCTATTGGTCGTAGTGCCATTTGC<br>TAAACCTGTTAG       |
| KAR2-R1      | AAGTCAGCCAAGATGGTTTTAACGACAGCATCGTTTCGAA<br>TAATTAGTTGTTTTTTGAT |
| KAR2-R2      | CAATAGCATGGCATACTTAATGCCGCCAAAGTCAGCCAA<br>GATGGTTTTAACGAC      |
| PDI1-F1      | ATTTTGTCCGCTCTCAGCTAGCACAAGCAATGGGTGCTT<br>TACTGAAAAACAAG       |
| PDI1-F2      | AACTGGAATATTAATACTGTGGCAAGTATTTGTCCGCTC<br>TCACACTAGCACAAG      |



| Primer                 | Sequence (5'-3')                                                 |
|------------------------|------------------------------------------------------------------|
| PDI1-R                 | TGCCACAGTTTTTAATATTCCAGTTGAATTGCATCGTTTCGA<br>ATAATTAGTTGTTTTTTG |
| PEP4-F1                | TTTGCTCTCTACTCTAGGTATTGGTGCTGAAGCCATGGGTG<br>CTTTTACTGAAAAACAAG  |
| PEP4-F2                | TTGACGGTACTACGATGTCAATTGCCATTGGTTTGCTCTCT<br>ACTCTAGGTATTGGTGCT  |
| PEP4-R                 | CAATTGACATCGTAGTACCGTCAAATATCATCGTTTCGAAT<br>AATTAGTTGTTTTTTGAT  |
| PpPIR1-F               | AATAATTGCTACTGCCCTTACTTGCGGTGCATACAGTATGG<br>GTGCTTTTACTGAAAAAC  |
| PpPIR1-R               | AGTAAGGGCAGTAGCAATTATTAAGTTCCTGTACATCATCG<br>TTTCGAATAATTAGTTGT  |
| PRY2-F1                | TCAGTATTGACCAAGGCCAACGCTATGGGTGCTTTTACTG<br>AAAAACAAGAAGC        |
| PRY2-F2                | TTCACATTTTCATTGCTATCAATTATCTCAGTATTGACCAAG<br>GCCAACGCT          |
| PRY2-R                 | AATTGATAGCAATGAAATGTGAAGTAATCTCATCGTTTCGA<br>ATAATTAGTTGTTTTTTG  |
| PP7435_CHR3-<br>1213-F | CGAAAAATATCAAGATCGATTGATTCTTGGAGATGATATGG<br>GTGCTTTTACTGAAAAAC  |
| PP7435_CHR3-<br>1213-R | CAATCGATCTTGATATTTTTCGGCGTATTGCTTTCCATCGT<br>TTCGAATAATTAGTTGT   |
| RCE3-F1                | GCTTCAAAATTCAGCTCTTGCTATGGGTGCTTTTACTGAA<br>AAACAAGAAG           |
| RCE3-F2                | CTGACATTGCTGGCTGTGCTGTTGTCGCTTCAAAATTCAG<br>CTCTTGCT             |
| RCE3-R                 | ACAGCACAGCCAGCAATGTCAGGGTGCTCATCGTTTCGA<br>ATAATTAGTTGTTTTTTGAT  |
| SCW10-F1               | CATGTTTCGTTGGCCGTGGCCATGGGTGCTTTTACTGAAAA<br>ACAAGAAG            |
| SCW10-F2               | GTAAATCTATCGTTAACCTACTGTTGGCATGTTTCGTTGGC<br>CGTGGCCAT           |

| Primer             | Sequence (5'-3')                                                                    |
|--------------------|-------------------------------------------------------------------------------------|
| SCW10-R            | ACAGTAGGTTAACGATAGATTAACTTGCATCGTTTCGAAT<br>AATTAGTTGTTTTTTGAT                      |
| SCW11-F1           | GCTCTTCATACAGGCATCCCTACAGATGGGTGCTTTTACTG<br>AAAAACAAG                              |
| SCW11-F2           | GCTATCAACTATCTTAAATATCTTTATCCTGTTGCTCTTCAT<br>ACAGGCATCCCT                          |
| SCW11-R            | CAGGATAAAGATATTTAAGATAGTTGATAGCATCGTTTCGA<br>ATAATTAGTTGTTTTTTG                     |
| TOS1-F1            | TTCACTTCCATCCAGTCTGCCTACGCTATGGGTGCTTTTAC<br>TGAAAAACAAGAAG                         |
| TOS1-F2            | AGTTATCAGCAACCTTACTGCTCTCCGTTTTCACTTCCATC<br>CAGTCTGCCTACG                          |
| TOS1-R             | CGGAGAGCAGTAAGGTTGCTGATAACTTCATCGTTTCGAA<br>TAATTAGTTGTTTTTTGAT                     |
| UTH1-F             | ACTTATCTTTATGGCTCTTGCCTCTCTGGTGGCCTCCATGG<br>GTGCTTTTACTGAAAAAC                     |
| UTH1-R             | GGCAAGAGCCATAAAGATAAGTTGAGATTTCATCGTTTCG<br>AATAATTAGTTGTTTTTTG                     |
| YPS1-1-F1          | ACCGGTTTCCGGCGTGATGGCAATGGGTGCTTTTACTGAA<br>AAACAAG                                 |
| YPS1-1-F2          | TTGCTTTGATAGCGAGCGTACCGGTTTCCGGCGTGATG<br>TAACAAGAACTGATCCTTCAACATCGTTTCGAATAATTAGT |
| YPS1-1-R1          | TGTTTTTTGAT                                                                         |
| YPS1-1-R2          | ACGCTCGCTATCAAAGCAACCCATAACAAGAACTGATCCT<br>TCAACAT                                 |
| BA75_02525T0<br>-F | GTCATCCTTTCACTATTCTGCTACTCATTGGCTATGGGTGC<br>TTTTACTGAAAAAC                         |
| BA75_02525T0<br>-R | GCAGAATAGTGAAAGGATGACAAATATTTTCATCGTTTCG<br>AATAATTAGTTGTTTTTTG                     |
| YMR321C-F          | GAACCTGTTACTGCTATTGGCTCCCACCATAAGTGCTATGG<br>GTGCTTTTACTGAAAAAC                     |

| Primer                   | Sequence (5'-3')                                                |
|--------------------------|-----------------------------------------------------------------|
| YMR321C-R                | CAATAGCAGTAACAGGTTCAATGGCAAGAGCATCGTTTCG<br>AATAATTAGTTGTTTTTTG |
| MPD1-F                   | TATCCTTGGCACTCCTCGTGTCTTTGGTTACTGCGATGGGT<br>GCTTTTACTGAAAAAC   |
| MPD1-R                   | GACACGAGGAGTGCCAAGGATAGTAACTTCATCGTTTCGA<br>ATAATTAGTTGTTTTTTG  |
| BA75_01272T0<br>/CPR5-F1 | GTTCGGATTATTATCCAGTTCCGTGTTTGCAATGGGTGCTT<br>TTACTGAAAAACAAGAAG |
| BA75_01272T0<br>/CPR5-F2 | TGAACTTTCTGCTTAGCTTTGTAAGTCTGTTCGGATTATTAT<br>CCAGTTCCG         |
| BA75_01272T0<br>/CPR5-R  | CAAAGCTAAGCAGAAAGTTCAACAATTCATCGTTTCGAA<br>TAATTAGTTGTTTTTTGAT  |
| BA75_00206T0<br>-F1      | TATTGCTGCCTCTGCTTCTGCCATGGGTGCTTTTACTGAAA<br>AACAAGAAGC         |
| BA75_00206T0<br>-F2      | TTGCTCAATATCGCAGCTCTTTTGGCTATTGCTGCCTCTGC<br>TTCTG              |
| BA75_00206T0<br>-R       | AAAAGAGCTGCGATATTGAGCAATTCATCGTTTCGAATA<br>ATTAGTTGTTTTTTGAT    |
| NCR1-F1                  | GTTTGTGGCCGGTCTGGTACAGGCTATGGGTGCTTTTACT<br>GAAAAACAAGAAGCTTTG  |
| NCR1-F2                  | TGAAAACCCTGCTCCCCCTACTCTTGCTGTTTGTGGCCGG<br>TCTGGTACAGGCTAT     |
| NCR1-R                   | AGCAAGAGTAGGGGGAGCAGGGTTTTTCATCGTTTCGAAT<br>AATTAGTTGTTTTTTGAT  |
| BA75_01378T0<br>-F       | AATCTCAGTGCTTCTTCTTTTACATTGGCCTTTGCTATGG<br>GTGCTTTTACTGAAAAAC  |
| BA75_01378T0<br>-R       | AAAAAGAAGAAGCACTGAGATTAATAATTCATCGTTTCG<br>AATAATTAGTTGTTTTTTG  |
| BA75_04539T0<br>-F1      | TTCTGTCAAACCGTCTTTGGTATGGGTGCTTTTACTGAAA<br>AACAAGAAGCTTTGGTTTC |
| BA75_04539T0<br>-F2      | AAGTCTCTACTGCTACTTCTTTTGGCTTTCTGTCAAACCGT<br>CTTTGGTAT          |

| Primer       | Sequence (5'-3')                                                |
|--------------|-----------------------------------------------------------------|
| BA75_04539T0 | AGCCAAAAGAAGTAGCAGTAGAGACTTCATCGTTTCGAA                         |
| -R           | TAATTAGTTGTTTTTTGATC                                            |
| BA75_01990T0 | GTCTCTGGGTGCTTCTGTTTTTGCAATGGGTGCTTTTACTG                       |
| -F1          | AAAAACAAGAAGCTTTG                                               |
| BA75_01990T0 | ATTGTTCCACATACTAGCGGCTTTGTCTCTGGGTGCTTCTG                       |
| -F2          | TTTTTGC                                                         |
| BA75_01990T0 | AAAGCCGCTAGTATGTGGAACAATTCATCGTTTCGAATA                         |
| -R           | ATTAGTTGTTTTTTGAT                                               |
| BA75_02958T0 | TTGTGGTTTATGGTGTCTGCAATGGGTGCTTTTACTGAAA                        |
| -F1          | AACAAGAAGCTTTGGTTTC                                             |
| BA75_02958T0 | GTTTCAGGATTGTTTGGCTGGTGTTTTTGTGGTTTATGGTG                       |
| -F2          | TCTGCAAT                                                        |
| BA75_02958T0 | AAACACCAGCCAAACAATCCTGAAACTCATCGTTTCGAAT                        |
| -R           | AATTAGTTGTTTTTTGATC                                             |
| BA75_02022T0 | TGCCCTGGCTGTCACAGCTCTGGGAATGGGTGCTTTTACT                        |
| -F1          | GAAAAACAAGAAGCTTTG                                              |
| BA75_02022T0 | GTTTGGAAGGTTCTATTTGCTATTTCTGCCCTGGCTGTCA                        |
| -F2          | CAGCTCTGGGAAT                                                   |
| BA75_02022T0 | ATAGCAAATAGAACCTTTCCAAACTGCATCGTTTCGAATA                        |
| -R           | ATTAGTTGTTTTTTGAT                                               |
| BA75_01121T0 | TGCCTGGTAGCAATTTGTCAGGGGATGGGTGCTTTTACTG                        |
| -F1          | AAAAACAAGAAGCTTTG                                               |
| BA75_01121T0 | GAGATTATCACCGTTGACAGCTTTAATATGCCTGGTAGCAA                       |
| -F2          | TTTGTCAAGGGGAT                                                  |
| BA75_01121T0 | ATTAAAGCTGTCAACGGTGATAATCTCATCGTTTCGAATAA                       |
| -R           | TTAGTTGTTTTTTGAT                                                |
| ADP1-F       | TCTGGCCCTAACATTGGCTCTTCGATTAGTGCAGGCAATG<br>GGTGCTTTTACTGAAAAAC |
| ADP1-R       | AAGAGCCAATGTTAGGGCCAGAACCGCAAGCATCGTTTC<br>GAATAATTAGTTGTTTTTTG |
| PPIase-F1    | AGCCTTTTGCTTGGTGTGGAGTATGGGTGCTTTTACTGA<br>AAAACAAGAAGCTTTG     |

| Primer              | Sequence (5'-3')                                                 |
|---------------------|------------------------------------------------------------------|
| PPlase-F2           | TGAATTAACTTTGATCTTGACACTAATTAGCCTTTTGCTT<br>GGTGTGGAGTAT         |
| PPlase-R            | ATTAGTGTCAAGATCAAAGTTAAATTCATCGTTTCGAATAA<br>TTAGTTGTTTTTTGAT    |
| UTR2-F1             | CTGGCTTCTTCGGTACTCGCTATGGGTGCTTTTACTGAAA<br>AACAAGAAGCTTTGGTTTC  |
| UTR2-F2             | AGACCAGTACTTTCGTTACTTTTGCTACTGGCTTCTTCGGT<br>ACTCGCTAT           |
| UTR2-R              | TAGCAAAAGTAACGAAAGTACTGGTCTCATCGTTTCGAAT<br>AATTAGTTGTTTTTTGATC  |
| YBR139W-F1          | TTGCTAGCATTGTGCGCAGGCCATGGGTGCTTTTACTGAAA<br>AACAAGAAGCTTTGGTTTC |
| YBR139W-F2          | AAATCGGTTATTTGGAGCCTTCTATCTTTGCTAGCATTGTC<br>GCAGGCCAT           |
| YBR139W-R           | AGATAGAAGGCTCCAAATAACCGATTCATCGTTTCGAAT<br>AATTAGTTGTTTTTTGATC   |
| OST1-F              | CTCAATTCTGTTCTTCTTATAGGCAGTGTATTTGGTATGG<br>GTGCTTTTACTGAAAAAC   |
| OST1-R              | ATAAGAAGGAACAGAATTGAGATAAATTCATCGTTTCGA<br>ATAATTAGTTGTTTTTTG    |
| ERP5-F1             | TTGGTAGGAATCACCAACGCCATGGGTGCTTTTACTGAAA<br>AACAAGAAGC           |
| ERP5-F2             | GTCTAAATTGTTGACTTTGTTGTTCTTATTGGTAGGAATCA<br>CCAACGCCAT          |
| ERP5-R              | TAGGAACAACAAAGTCAACAATTTAGACATCGTTTCGAAT<br>AATTAGTTGTTTTTTGATC  |
| BA75_04668T0<br>-F1 | CAGCTCTAGTATCACTTGCTGCCGGAATGGGTGCTTTTACT<br>GAAAAACAAGAAGC      |
| BA75_04668T0<br>-F2 | GCTGAAAAGAAGGTTGTGTCGTTGATATTTTCAGCTCTAG<br>TATCACTTGCTGCCGGAAT  |
| BA75_04668T0<br>-R  | TATCAACGACACAACCTTCTTTTCAGCCATCGTTTCGAATA<br>ATTAGTTGTTTTTTGATC  |

| Primer              | Sequence (5'-3')                                                |
|---------------------|-----------------------------------------------------------------|
| PLB3-F1             | CTCTTGGCTTGGAATTTGTTTCTGCAATGGGTGCTTTTACT<br>GAAAAACAAGAAGC     |
| PLB3-F2             | CCCTTCCTATTGTGGCAACTTTACTCATAGCTCTTGGCTTG<br>GAATTTGTTTCTGCAAT  |
| PLB3-R              | GAGTAAAGTTGCCACAATAGGAAGGGCCATCGTTTCGAAT<br>AATTAGTTGTTTTTTGATC |
| BA75_00184T0<br>-F1 | CTCGTGCATGTGGTCCTTGGCATGGGTGCTTTTACTGAAA<br>AACAAGAAGCTTTGGTTTC |
| BA75_00184T0<br>-F2 | TATATTCGGTGACAATTCTTTTGCTTCTCGTGCATGTGGTC<br>CTTGGCAT           |
| BA75_00184T0<br>-R  | AAGCAAAAGAATTGTCACCGAATATAGCATCGTTTCGAAT<br>AATTAGTTGTTTTTTGATC |
| BA75_01365T0<br>-F1 | TTGTTCTGCACGGCAGAAGCTATGGGTGCTTTTACTGAAA<br>AACAAGAAGCTTTGGTTTC |
| BA75_01365T0<br>-F2 | AGGCCAGGCTGGATATTCGTGGCGTTAGGAGCTTTGTTCT<br>GCACGGCAGAAGCTAT    |
| BA75_01365T0<br>-R  | TAACGCCACGAATATCCAGCCTGGCCTCATCGTTTCGAAT<br>AATTAGTTGTTTTTTGATC |
| YKE4-F1             | TGTGTAGGAAGCGTGTTTGCTATGGGTGCTTTTACTGAAA<br>AACAAGAAGCTTTGGTTTC |
| YKE4-F2             | GAAACTATCAACTTCGATTCTCCTATTCTTCTGTGTAGGAA<br>GCGTGTTTGCTAT      |
| YKE4-R              | GAATAGGAGAATCGAAGTTGATAGTTTCATCGTTTCGAAT<br>AATTAGTTGTTTTTTGATC |
| BA75_04506T0<br>-F1 | TTTTGTTGTTTGAATGTGTGTACGGTATGGGTGCTTTTACT<br>GAAAAACAAGAAGC     |
| BA75_04506T0<br>-F2 | GCACCTCTAATCAGATATGTAACAACGTTTGTTTTGTTGTT<br>TGAATGTGTGTACGGTAT |
| BA75_04506T0<br>-R  | CGTTGTTACATATCTGATTAGAGGTGCCATCGTTTCGAATA<br>ATTAGTTGTTTTTTGATC |
| ERO1-F1             | CCTGTTATTGTATAACAGCGTTAGCAATGGGTGCTTTTACT<br>GAAAAACAAGAAGC     |

| Primer              | Sequence (5'-3')                                                |
|---------------------|-----------------------------------------------------------------|
| ERO1-F2             | AGGATAGTAAGGAGCCTAGCTGTTACAATAACCTGTTATT<br>GTATAACAGCGTTAGCAAT |
| ERO1-R              | TGTAACAGCTAGGCTCCTTACTATCCTCATCGTTTCGAATA<br>ATTAGTTGTTTTTTGATC |
| EMP70-F1            | TCGATAAAGATAGTCGAAGGCATGGGTGCTTTTACTGAAA<br>AACAAGAAGCTTTGGTTTC |
| EMP70-F2            | CGATTGTTATTATGGATATTGCTTCTTTCGATAAAGATAGTC<br>GAAGGCAT          |
| EMP70-R             | AAGAAGCAATATCCATAATAACAATCGCATCGTTTCGAATA<br>ATTAGTTGTTTTTTGATC |
| BA75_02926T0<br>-F1 | TTCAGTGTTCAAGTCTTCGCTATGGGTGCTTTTACTGAAA<br>AACAAGAAGCTTTGGTTTC |
| BA75_02926T0<br>-F2 | TATAGAAAAGCTGCTCCCTCTTGCTTTATTCAGTGTTCAAGT<br>CTTCGCTAT         |
| BA75_02926T0<br>-R  | TAAAGCAAGAGGGAGCAGTTTTCTATACATCGTTTCGAAT<br>AATTAGTTGTTTTTTGATC |
| BA75_01328T0<br>-F1 | CTGCCATCGGCCATCTACGCTATGGGTGCTTTTACTGAAA<br>AACAAGAAGCTTTGGTTTC |
| BA75_01328T0<br>-F2 | ATGAAGTTTAAACACATTAATCACATTAGTTGCCCTGCCATC<br>GGCCATCTACGCTAT   |
| BA75_01328T0<br>-R  | AACTAATGTGATTAATGTGTAAACTTCATCGTTTCGAATA<br>ATTAGTTGTTTTTTGATC  |
| BA75_02520T0<br>-F1 | CTAATAGACTTGACGTATGCCATGGGTGCTTTTACTGAAA<br>AACAAGAAGCTTTGGTTTC |
| BA75_02520T0<br>-F2 | TCTTTTTGAAGGTATGGTTGATATGGTTACTAATAGACTTG<br>ACGTATGCCATGGGT    |
| BA75_02520T0<br>-R  | CCATATCAACCATACCTTCAAAAAGATCATCGTTTCGAATA<br>ATTAGTTGTTTTTTGATC |
| BA75_05051T0<br>-F1 | GCATTAAGCGTTGTAAAGGCTATGGGTGCTTTTACTGAAA<br>AACAAGAAGCTTTGGTTTC |
| BA75_05051T0<br>-F2 | CAATTCAAACGTTTGATCGGTGCAATTTTCGCATTAAGCG<br>TTGTAAAGGCTATGGGT   |

| Primer                 | Sequence (5'-3')                                                     |
|------------------------|----------------------------------------------------------------------|
| BA75_05051T0           | AATTGCACCGATCAAACGTTTGAATTGCATCGTTTCGAAT                             |
| -R                     | AATTAGTTGTTTTTTGATC                                                  |
| GAS2-F1                | TTATTGATCCTCTTTGGTACTGCATTGCGCATGGGTGCTTT<br>TACTGAAAAACAAGAAGC      |
| GAS2-F2                | TGCTGAGTTTCAAAGGTCTTTTTGTCTTATTGATCCTCTTT<br>GGTACTGCATTGCGCAT       |
| GAS2-R                 | GACAAAAAGACCTTTGAAACTCAGCATCGTTTCGAATAAT<br>TAGTTGTTTTTTGATCTTC      |
| PpPIR2-F               | CTCCACTATTGCATTAATACTATTTTACCCGTTGCCTTGGCTAT<br>GGGTGCTTTTACTGAAAAAC |
| PpPIR2-R               | AAATAGTTAATGCAATAGTGGAGAGTGCAGCGAGCTTCAT<br>CGTTTCGAATAATTAGTTGT     |
| MSB2-F                 | TCTTATACTTACAGTAACACTGTTATCTCCAGCTTTGGCAA<br>TGGGTGCTTTTACTGAAAAAC   |
| MSB2-R                 | ACAGTGTTACTGTAAGTATAAGAAAGGAGTTTAAATTAAT<br>CATCGTTTCGAATAATTAGTTGT  |
| PP7435_CHR3-<br>1225-F | AGCTTGGGGTTTCCTTTATGTTCCCCTTGTAAGTGGGAATGG<br>GTGCTTTTACTGAAAAAC     |
| PP7435_CHR3-<br>1225-R | ATAAAGGAAACCCCAAGCTAAGATTGTAAAGAGGTTTCATC<br>GTTTCGAATAATTAGTTGT     |
| FPR2-F                 | TCTGGCTGTGTTCTTATTAGTTAGACTCGTTTGCGCTATGG<br>GTGCTTTTACTGAAAAAC      |
| FPR2-R                 | CTAATAAGAACACAGCCAGAAATTTGGTCGTAGAACTTT<br>CATCGTTTCGAATAATTAGTTG    |
| GAS3-F                 | TTGACACTCGTTGCTGTTGCTAAGGCCATGGGTGCTTTTA<br>CTGAAAAAC                |
| GAS3-R                 | CAGCAACGAGTGTCAATAATGGTAAGAGTAGTTTCATCGT<br>TTCGAATAATTAGTTG         |
| FLO11-F1               | CTGCAGGTCTGACAAGAGCTCATGGAATGGGTGCTTTTAC<br>TGAAAAACAAGAAGCTTTG      |
| FLO11-F2               | ATCGATATTCACCTCTTCTATCTTAGCTGCAGGTCTGACAA<br>GAGCTC                  |



| Primer                  | Sequence (5'-3')                                                  |
|-------------------------|-------------------------------------------------------------------|
| FLO11-R                 | CTAAGATAGAAGAGGTGAATATCGATCGCAGTGAAACCAT<br>CGTTTCGAATAATTAGTTG   |
| BA75_04148T0<br>-F1     | ACTGTTTCTACTGCAGCTATTTTGTGTCCTTGGTGTACAAG<br>GAATGGGTGCTTTTACTG   |
| BA75_04148T0<br>-F2     | CGTGTATGTTTATAAGCAATAAAGTTTCGGTCTCGCTACTG<br>TTTCTACTGCAGCTATTTTG |
| BA75_04148T0<br>-R      | CTTTATTGCTTATAAACATACACGATATAGCACTAGGCATC<br>GTTTCGAATAATTAGTTG   |
| CDA2-F                  | GTATATAATCATTTTGTGACTCTGATAGTTTCAGCTTTCTC<br>CATGGGTGCTTTTACTG    |
| CDA2-R                  | CAGAGTCAACAAAATGATTATATACTGTGTCTTTTGAGTCA<br>TCGTTTCGAATAATTAGT   |
| BA75_00070T0<br>-F      | TTTGATCTTAGCTATTGCAGCAGCATCCACTGTTGTCTCAG<br>CTATGGGTGCTTTTACTG   |
| BA75_00070T0<br>-R      | ATGCTGCTGCAATAGCTAAGATCAAATTGGTAGAGAACTT<br>CATCGTTTCGAATAATTAG   |
| BA75_04419T0<br>-F      | GTTGGTGCTATTATTGCTTCTCGTGTTGGGAAGTGGCATGG<br>GTGCTTTTACTGAAAAAC   |
| BA75_04419T0<br>-R      | CCAACACGAGAAGCAATAATAGCACCAACAATAGTAACAT<br>CGTTTCGAATAATTAGTTG   |
| BA75_02630T0<br>-F      | TTCTGCTTTGCTTTCAGTTCTGTCCGTCGTTTTGGCCATGG<br>GTGCTTTTACTGAAAAAC   |
| BA75_02630T0<br>-R      | ACAGAACTGAAAGCAAAGCAGAAATTTTCAAGTAAGACA<br>TCGTTTCGAATAATTAGTTG   |
| PP7435_CHR4-<br>0690-F1 | TTGCTGACTCTAGCCAGTGTCTCAATGGGAATGGGTGCTT<br>TACTGAAAAACAAGAAGC    |
| PP7435_CHR4-<br>0690-F2 | AATTCAACAGTGTCGTCATCAGCCAACCTTTTGCTGACTCT<br>AGCCAGTGTCT          |
| PP7435_CHR4-<br>0690-R  | GTTGGCTGATGACGACACTGTTGAATTGCATCGTTTCGAA<br>TAATTAGTTGTTTTTTGAT   |
| BA75_04741T0<br>-F1     | CGAGCGTACCGGTTTCCAGCGTGTTGGCAATGGGTGCTTT<br>TACTGAAAAACAAG        |

| Primer              | Sequence (5'-3')                                                                                |
|---------------------|-------------------------------------------------------------------------------------------------|
| BA75_04741T0<br>-F2 | TTATGGGTCGCTTTGATAGCGAGCGTACCGGTTTCCAGC                                                         |
| BA75_04741T0<br>-R  | CTATCAAAGCGACCCATAACAAGAACTGATCCTTCAACAT<br>CGTTTCGAATAATTAGTTG                                 |
| BA75_04680T0<br>-F  | TGCGCTATTGTCGCTCCAAAATTTAGCTCTTGCTATGGGTG<br>CTTTTACTGAAAAACAAG                                 |
| BA75_04680T0<br>-R  | GGAGCGACAATAGCGCAGCCAGCAGTGCCAGAGTGCTCA<br>TCGTTTCGAATAATTAGTTG                                 |
| bAHSP-F             | ACAACTATTTCGAAACGCGGCCGCGCATGGCTTTGATTCAAA<br>CTAATAAGGATTTGATTTC                               |
| bAHSP-R             | TAGAAAGCTGGCGGCCGCGCGGAGATCTTTATGAAGATT<br>TCAAGAAATTTCTG                                       |
| hAHSP-F             | CAACTATTTTCGAAACGGGATCCATGGCTTTGTTGAAGGCA<br>AATAAGGATTTGATCTC                                  |
| hAHSP-R             | TAGAAAGCTGGCGGCCGCGCGGTTATGAAGATGGTGGT<br>GGATGTGATG                                            |
| pAHSP-F             | GAACAACTATTTTCGAAACGCGGCCGCGCATGGCTTTGTTGCC<br>AACTAACCAAGATTTGATC                              |
| pAHSP-R             | TGTTCTAGAAAGCTGGCGGCCGCGCGGAGATCTTTATAA<br>AGATTTCAAGAAATTTCTG                                  |
| pGAP-F              | AGATCTCCGCGGCCGCGGCCAGCTTTCTAGAACAAAAAC<br>TCATCTCAGAAG                                         |
| pGAP-R              | CATGCGGCCGCGTTTTTCGAAATAGTTGTTCAATTGATTGAA<br>ATAGGGACAAAT                                      |
| VPS10g1-F1          | TGAGGACGAAACGAGTAAGCTCGTCGTGTACGTGTCTCAT<br>AACGGGTTTTAGAGCTAGAAATAGCAAGTTAAAATAAGGC<br>TAGTCCG |
| VPS10g1-R2          | CGAGCTTACTCGTTTCGTCCTCACGGACTCATCAGGTGTA<br>CTTTGATTTGTTTAGGTAAGTTGAACTGGATGTATTAGTTT<br>GGTGAC |

| Primer               | Sequence (5'-3')                                                                                |
|----------------------|-------------------------------------------------------------------------------------------------|
| VTH1g2-F1            | TGAGGACGAAACGAGTAAGCTCGTCGTACCCAGTATTCA<br>ACAGGAGTTTTAGAGCTAGAAATAGCAAGTTAAAATAAG<br>GCTAGTCCG |
| VTH1g2-R2            | CGAGCTTACTCGTTTCGTCCTCACGGACTCATCAGGTACC<br>CTTTGATTTGTTTAGGTAAGTTGAACTGGATGTATTAGTTT<br>GGTGAC |
| PEP5g1-F1            | TGAGGACGAAACGAGTAAGCTCGTCATTAACCGAAACCT<br>CAACGTGTTTTAGAGCTAGAAATAGCAAGTTAAAATAAGG<br>CTAGTCCG |
| PEP5g1-R2            | CGAGCTTACTCGTTTCGTCCTCACGGACTCATCAGATTAA<br>CTTTGATTTGTTTAGGTAAGTTGAACTGGATGTATTAGTTT<br>GGTGAC |
| Cas9-backbone-<br>R1 | TGTTTGCCGGATCAAGAGCTACCAACTCT                                                                   |
| Cas9-backbone-<br>F2 | AGAGTTGGTAGCTCTTGATCCGGCAAAC                                                                    |
| UPVPS-F              | GGTTTGACTGAACAAGAGTTCAAAAGTAAATACAAAGAA<br>GAATACCAG                                            |
| UPVPS-R              | CCGTGGGTGAGCTATTTCCAAAAGCAATTGGAAACAGTT<br>G                                                    |
| DoVPS-F              | CAATTGCTTTTGGAATAGCTCACCCACGGTCACACAC                                                           |
| DoVPS-R              | TCCATGGGTGGAGTTCTGCCTGGAG                                                                       |
| Up-Do<br>-VPS-F      | TGCAGGTCGACGATGGTTTGACTGAACAAGAGTTCAAAA<br>GTAAATAC                                             |
| Up-DO<br>-VPS-R      | GATCCTCTAGAGATTCCATGGGTGGAGTTCTGCCTGGAG                                                         |
| T-VPS-F              | ACTCCACCCATGGAATCTCTAGAGGATCCCCGGGTACCGA<br>G                                                   |
| T-VPS-R              | G TTCAGTCAAACCATCGTCGACCTGCAGGCATGCAAG                                                          |
| UpVTH1-F             | TCGGATTTTTTAGAAAGCCTTTGTACAAATAAGTATGCTCG<br>AAACATTC                                           |

| Primer             | Sequence (5'-3')                                                |
|--------------------|-----------------------------------------------------------------|
| UpVTH1-R           | TATTTTCTTTCCTTTGATCACCAGATCTTTTAACTCGTTGTA<br>TATATTTATTAGACATG |
| DoVTH1-F           | ACGAGTTAAAAGATCTGGTGATCAAAGGAAAGAAAATAA<br>AGAGTTTCTATGGATTG    |
| DoVTH1-R           | TACCCATGAAACCGTCAATATGAAGAATAACACTAACCAG                        |
| Up-Do<br>-VTH1-F   | TGCAGGTCGACGATTCGGATTTTTTAGAAAGCCTTTGTAC<br>AAATAAG             |
| Up-DO<br>-VTH1-R   | GATCCTCTAGAGATTACCCATGAAACCGTCAATATGAAGA<br>ATAACAC             |
| T-VTH1-F           | CGGTTTCATGGGTAATCTCTAGAGGATCCCCGGGTACCGA<br>G                   |
| T-VTH1-R           | CTAAAAAATCCGAATCGTCGACCTGCAGGCATGCAAG                           |
| UpPEP5-F           | TTGTTGTCAAATGGTGTGGATGCAAGCCATTGTATTTTT<br>CACACCTA             |
| UpPEP5-R           | GGGTAAAGTAAGCACAGATTATTAGTTTGGAGGGTGTATT<br>TCAGCCATTTGATGATAAT |
| DoPEP5-F           | TACACCCTCCAACTAATAATCTGTGCTTACTTAACCCTGA<br>CATCACCCCATATAGC    |
| DoPEP5-R           | GTGTGTTTTTCAGAGCAAATAGTATCAATAACGTCAGTGGG<br>TGGAGATC           |
| Up-Do<br>-PEP5-F   | TGCAGGTCGACGATTTGTTGTCAAATGGTGTGGATGCA<br>AGCCATT               |
| Up-DO<br>-PEP5-R   | GATCCTCTAGAGATGTGTGTTTTTCAGAGCAAATAGTATCA<br>ATAACGTCAG         |
| T-PEP5-F           | CTCTGAAAACACACATCTCTAGAGGATCCCCGGGTACCGA<br>G                   |
| T-PEP5-R           | ATTTTGACAACAAATCGTCGACCTGCAGGCATGCAAG                           |
| Fg1-HB $\alpha$ -F | AGTTACCCAACTCTGTTATCTCACTAATTCAGATCTAACAT<br>CCAAAGACGAAAGGTTG  |
| Fg1-HB $\alpha$ -R | ATTATTAAGCACATCCGCTTGTATTCTAGGATCCGCACAAA<br>CGAAGGTCTCACTTAATC |
| Fg1pMD18T-F        | TAGAATACAAGCGGATGTGCTTAATAAT                                    |

| Primer                | Sequence (5'-3')                                                |
|-----------------------|-----------------------------------------------------------------|
| FglpMD18T-R           | GAATTAGTGAGATAACAGAGTTGGGTAAC                                   |
| bHB $\alpha$ -DSE4-F1 | TGTTGACCAATATAGTCAGTGGACATCACCATCACCATCA<br>CGTTTTATCTGCTGCAGAT |
| All-DSE4-F2           | TTCCAACGTGCCACAACCTTTCTTGTTGTTGGTTCTGTTG<br>ACCAATATAGTCAGTGGAC |
| All-DSE4-R            | GAAAAGTTGTGGCACGTTGGAAGAGAATGACATCGTTTC<br>GAATAATTAGTTGTTTTTTG |
| hHB $\alpha$ -DSE4-F1 | TGTTGACCAATATAGTCAGTGGACATCACCATCACCATCA<br>CGTTTTGTCTCCAGCTGAT |
| pHB $\alpha$ -DSE4-F1 | TGTTGACCAATATAGTCAGTGGACATCACCATCACCATCA<br>CGTTTTATCTGCTGCAG   |
| bHB $\alpha$ -SUN4-F1 | TAGCTGGTCTTGCAATTGCACATCACCATCACCATCACGTT<br>TTATCTGCTGCAGATAAG |
| All-SUN4-F2           | TTACAGCCTGCGCTGTTACTCTAGCTGGTCTTGCAATTGC<br>ACATCACCATCACCATCAC |
| All-SUN4-R            | AACAGCGCAGGCTGTAAGAGCGGATATCTTCATCGTTTCG<br>AATAATTAGTTGTTTTTTG |
| hHB $\alpha$ -SUN4-F1 | GCTGGTCTTGCAATTGCACATCACCATCACCATCACGTTTT<br>GTCTCCAGCTGATAAAAC |
| pHB $\alpha$ -SUN4-F1 | AGCTGGTCTTGCAATTGCACATCACCATCACCATCACGTT<br>TTATCTGCTGCAGATAAAG |
| Tg1-HB $\beta$ -F     | ATTCCAATCCTGTCTGGCCTCCTAGATCTAACATCCAAAGA<br>CGAAAGGTTGAATG     |
| Tg1-HB $\beta$ -R     | CGCAATCTGACACGAGTTGGAATGGGGATCCGCACAAAC<br>GAAGGTCTCACTTAATCTTC |
| Tg1pMD18T-F           | CCATTCCAACCTCGTGTGTCAGATTGCGT                                   |
| Tg1pMD18T-R           | AGGAGGCCAGACAGGATTG                                             |
| Gg2-HB $\beta$ -F     | ATTTTAAGATTTCAATCTTGAAGATCTAACATCCAAAGACG<br>AAAGGTTGAATGAAACCT |
| Gg2-HB $\beta$ -R     | ACATGCGACTATTATCGATCAATGAAATGGATCCGCACAA<br>ACGAAGGTCTCACTTAATC |

| Primer               | Sequence (5'-3')                                                    |
|----------------------|---------------------------------------------------------------------|
| Gg2pMD18T-F          | ATTCATTGATCGATAATAGTCGCATGTGAGGCTGAAATGT<br>GC                      |
| Gg2pMD18T-R          | TCAAGATTGAAATCTTAAAATTGCCCCTTTCAGTTGACAG<br>GAT                     |
| bHB $\beta$ -DSE4-F1 | TGTTGACCAATATAGTCAGTGGACATCACCATCACCATCA<br>CTTAACTGCAGAAGAAAAAGCT  |
| hHB $\beta$ -DSE4-F1 | TGTTGACCAATATAGTCAGTGGACATCACCATCACCATCA<br>CGTTCATTTGACTCCAGAAG    |
| pHB $\beta$ -DSE4-F1 | TCTGTTGACCAATATAGTCAGTGGACATCACCATCACCATC<br>ACGTTTCATTTGTCTGCAGAAG |
| bHB $\beta$ -SUN4-F1 | AGCTGGTCTTGCAATTGCACATCACCATCACCATCACTTA<br>ACTGCAGAAGAAAAAGCTG     |
| hHB $\beta$ -SUN4-F1 | GGTCTTGCAATTGCACATCACCATCACCATCACGTTTCATT<br>GACTCCAGAAGAAAAATC     |
| pHB $\beta$ -SUN4-F1 | TGGTCTTGCAATTGCACATCACCATCACCATCACGTTTCATT<br>TGTCTGCAGAAGAAAAAG    |
| Donor-Fg1-F          | ACAGACATGTCTTGTCCTTAGGAG                                            |
| Donor-Fg1-R          | TCTCCCCTAGTTCACGGTTTATTAG                                           |
| Donor-Tg1-F          | TTCAACTTCAATTTTCGGCTCTGTCTG                                         |
| Donor-Tg1-R          | TCTCCTCGTATCTCTTTTGAGACCATTG                                        |
| Donor-Gg2-F          | CAAACAGTTGGTAGTACAAGAAGCATTG                                        |
| Donor-Gg2-R          | GATTATGGTACATCCCTTAAATGCAGCG                                        |
| DonorVPS10-F         | GGTTTGACTGAACAAGAGTTCAAAAGTAAATACAAAG                               |
| DonorVPS10-R         | TCCATGGGTGGAGTTCTGCCT                                               |
| DonorVTH1-F          | TCGGATTTTTTAGAAAGCCTTTGTACAAATAAGTATGCTC                            |
| DonorVPS10-R         | TACCCATGAAACCGTCAATATGAAGAATAACACTAAC                               |
| DonorPEP5-F          | TTGTTGTCAAATGGTGTGGATGCAAG                                          |
| DonorPEP5-R          | GTGTGTTTTTCAGAGCAAATAGTATCAATAACGTCAGTG                             |

**Table S6 Endogenous signal peptides used in this study**

| <b>GenBank<br/>Accession</b>                                                                 | <b>Ordered locus<br/>name / Gene<br/>name</b> | <b>Signal peptides Sequence (5'-3')</b>                                         |
|----------------------------------------------------------------------------------------------|-----------------------------------------------|---------------------------------------------------------------------------------|
| <b>The first 40 endogenous signal peptides predicted by signalP6.0 in <i>P. pastoris</i></b> |                                               |                                                                                 |
| ANZ73100.1                                                                                   | BA75_01736T0<br>/ MPD1                        | ATGAAGTTACTATCCTTGGCACTCCTCGTG<br>TCTTTGGTTACTGCG                               |
| ANZ75146.1                                                                                   | BA75_02525T0<br>/ EMP24                       | ATGAAAATATTTGTCATCCTTTCCTATTTC<br>TGCTACTCATTGGCT                               |
| ANZ76017.1                                                                                   | BA75_01931T0                                  | ATGAAGATATCCGCTCTTACAGCCTGCGCT<br>GTTACTCTAGCTGGTCTTGCAATTGCA                   |
| ANZ76280.1                                                                                   | BA75_03275T0<br>/ YMR321C                     | ATGCTCTTGCCATTGAACCTGTTACTGCTA<br>TTGGCTCCCACCATAAGTGCT                         |
| ANZ73842.1                                                                                   | BA75_01272T0                                  | ATGAAATTGTTGAACCTTCTGCTTAGCTTT<br>GTAACCTCTGTTTCGGATTATTATCCAGTTCC<br>GTGTTTGCA |
| ANZ77874.1                                                                                   | BA75_04419T0                                  | ATGTTACTATTGTTGGTGCTATTATTGCTT<br>CTCGTGTTGGGAAGTGGC                            |
| ANZ74063.1                                                                                   | BA75_00206T0                                  | ATGAAATTGCTCAATATCGCAGCTCTTTTG<br>GCTATTGCTGCCTCTGCTTCTGCC                      |
| ANZ73700.1                                                                                   | BA75_01371T0<br>/ NCR1                        | ATGAAAACCCTGCTCCCCCTACTCTTGCTG<br>TTTGTGGCCGGTCTGGTACAGGCT                      |
| ANZ74444.1                                                                                   | BA75_01378T0                                  | ATGAAATTATTAATCTCAGTGCTTCTTCTT<br>TTTACATTGGCCTTTGCT                            |
| ANZ73364.1                                                                                   | BA75_00070T0<br>/ PRY2                        | ATGAAGTTCTCTACCAATTTGATCTTAGCT<br>ATTGCAGCAGCATCCACTGTTGTCTCAGCT                |
| ANZ77614.1                                                                                   | BA75_04539T0                                  | ATGAAGTCTCTACTGCTACTTCTTTTGGCT<br>TTCTGTCAAACCGTCTTTGGT                         |
| ANZ76231.1                                                                                   | BA75_01990T0                                  | ATGAAATTGTTCCACATACTAGCGGCTTTG<br>TCTCTGGGTGCTTCTGTTTTTGCA                      |
| ANZ76279.1                                                                                   | BA75_02958T0                                  | ATGAGTTTCAGGATTGTTTGGCTGGTGTTT<br>TTGTGGTTTATGGTGTCTGCA                         |
| ANZ75129.1                                                                                   | BA75_02022T0                                  | ATGCAGTTTGGAAAGGTTCTATTTGCTATT<br>TCTGCCCTGGCTGTCACAGCTCTGGGA                   |
| ANZ74354.1                                                                                   | BA75_01121T0                                  | ATGAGATTATCACCGTTGACAGCTTTAATA<br>TGCCTGGTAGCAATTTGTCAGGGG                      |
| ANZ76406.1                                                                                   | BA75_03570T0<br>/ ADP1                        | ATGCTTGCGGTTCTGGCCCTAACATTGGCT<br>CTTCGATTAGTGCAGGCA                            |
| ANZ77943.1                                                                                   | BA75_04786T0<br>/ PPIase                      | ATGAATTTAACTTTGATCTTGACACTAATT<br>AGCCTTTTGCTTGGTGTTTGGAGT                      |
| ANZ74747.1                                                                                   | BA75_01243T0<br>/ UTR2                        | ATGAGACCAGTACTTTCGTTACTTTTGCTA<br>CTGGCTTCTTCGGTACTCGCT                         |
| ANZ76773.1                                                                                   | BA75_03915T0<br>/ YBR139W                     | ATGAAATCGGTTATTTGGAGCCTTCTATCT<br>TTGCTAGCATTGTCGCAGGCC                         |
| ANZ76351.1                                                                                   | BA75_03798T0<br>/ OST1                        | ATGAAATTTATCTCAATTCTGTTTCCTTCTT<br>ATAGGCAGTGTATTTGGT                           |

| GenBank<br>Accession | Ordered locus<br>name / Gene<br>name | Signal peptides Sequence (5'-3')                                                                            |
|----------------------|--------------------------------------|-------------------------------------------------------------------------------------------------------------|
| ANZ77164.1           | BA75_04148T0                         | ATGCCTAGTGCTATATCGTGTATGTTTATA<br>AGCAATAAAGTTTCGGTCTCGCTACTGTTT<br>CTACTGCAGCTATTTTGTGTCTTGGTGTA<br>CAAGGA |
| ANZ75389.1           | BA75_02602T0<br>/ ERP5               | ATGTCTAAATTGTTGACTTTGTTGTTTCTA<br>TTGGTAGGAATCACCAACGCC                                                     |
| ANZ75795.1           | BA75_02630T0                         | ATGTCTTACTTGAAAATTTCTGCTTTGCTTT<br>CAGTTCTGTCCGTCGTTTTGGCC                                                  |
| ANZ77919.1           | BA75_04668T0                         | ATGGCTGAAAAGAAGGTTGTGTCTGTTGAT<br>ATTTTCAGCTCTAGTATCACTTGCTGCCGG<br>A                                       |
| ANZ76251.1           | BA75_03304T0                         | ATGAGGTTACAGCTGCAATCTTTCATATTT<br>TTCTTGCTTAGCACAGTGAATGTGCTGGCT<br>ATGTTGAAGGATCAGTTCTTGTATGGGTC           |
| ANZ77259.1           | BA75_04741T0                         | GCTTTGATAGCGAGCGTACCGGTTTCCAGC<br>GTGTTGGCA                                                                 |
| ANZ75299.1           | BA75_03164T0<br>/ PLB3               | ATGGCCCTTCCTATTGTGGCAACTTTACTC<br>ATAGCTCTTGGCTTGGAATTTGTTTCTGCA                                            |
| ANZ73777.1           | BA75_00184T0                         | ATGCTATATTCGGTGACAATTCTTTTGCTT<br>CTCGTGCATGTGGTCCTTGGC                                                     |
| ANZ73985.1           | BA75_01365T0                         | ATGAGGCCAGGCTGGATATTCGTGGCGTT<br>AGGAGCTTTGTTCTGCACGGCAGAAGCT                                               |
| ANZ74717.1           | BA75_00578T0<br>/ YKE4               | ATGAACTATCAACTTCGATTCTCCTATTC<br>TTCTGTGTAGGAAGCGTGTTTGCT                                                   |
| ANZ77995.1           | BA75_04506T0                         | ATGGCACCTCTAATCAGATATGTAACAAC<br>GTTTGTTTTGTGTTTGAATGTGTGTACGG<br>T                                         |
| ANZ74048.1           | BA75_01546T0<br>/ ERO1               | ATGAGGATAGTAAGGAGCCTAGCTGTTAC<br>AATAACCTGTTATTGTATAACAGCGTTAGC<br>A                                        |
| ANZ75750.1           | BA75_02375T0<br>/ EMP70              | ATGCGATTGTTATTATGGATATTGCTTCTT<br>TCGATAAAGATAGTCGAAGGC                                                     |
| ANZ76012.1           | BA75_02926T0                         | ATGTATAGAAAAGCTGCTCCCTCTTGCTTTA<br>TTCAGTGTTCAAGTCTTCGCT                                                    |
| ANZ77964.1           | BA75_04680T0                         | ATGAGCACTCTGGCACTGCTGGCTGCGCT<br>ATTGTCGCTCCAAAATTTAGCTCTTGCT                                               |
| ANZ73481.1           | BA75_00002T0                         | ATGAATTTTTTATTGTTGCTAGCTTGGAGC<br>GTTAGCCTTACTAACTCGTCTTGGGA                                                |
| ANZ73657.1           | BA75_01328T0                         | ATGAAGTTTAACACATTAATCACATTAGTT<br>GCCCTGCCATCGGCCATCTACGCT                                                  |
| ANZ76075.1           | BA75_02520T0                         | ATGATCTTTTTGAAGGTATGGTTGATATGG<br>TACTAATAGACTTGACGTATGCC                                                   |
| ANZ78090.1           | BA75_05051T0                         | ATGCAATTCAAACGTTTGATCGGTGCAATT<br>TTCGCATTAAGCGTTGTTAAGGCT                                                  |



| GenBank<br>Accession                                                   | Ordered locus<br>name / Gene<br>name | Signal peptides Sequence (5'-3')                                                                          |
|------------------------------------------------------------------------|--------------------------------------|-----------------------------------------------------------------------------------------------------------|
| ANZ73202.1                                                             | BA75_00325T0<br>/ GAS2               | ATGCTGAGTTTCAAAGGTCTTTTGTCTTA<br>TTGATCCTCTTTGGTACTGCATTTGGC                                              |
| <b>Signal peptides obtained by secretome in <i>P. pastoris</i> [3]</b> |                                      |                                                                                                           |
| CCA37346.1                                                             | PP7435_Ch1-<br>1218/BGL2             | ATGATCTTTAATCTTAAAACACTGGCTGCG<br>GTTGCAATCTCCATTTACAAAGTGTCTGCA                                          |
| CCA36562.2                                                             | PP7435_Ch1-<br>0405/CDA2             | ATGACTCAAAAGACACAGTATATAATCAT<br>TTTGTGACTCTGATAGTTTCAGCTTTCTCC                                           |
| CCA36730.1                                                             | PP7435_Ch1-<br>0581/CPR5             | ATGAAATTGTTGAACCTTTCTGCTTAGCTTT<br>GTAACCTCTGTTTCGGATTATTATCCAGTTCC<br>GTGTTTGCA                          |
| CCA39139.1                                                             | PP7435_Ch3-<br>0167/CTS1             | ATGAAATTTTTTTACTTTGCGGGGTTTCATA<br>TCTCTGTTACAGCTGATATTTCGCC                                              |
| CCA36592.1                                                             | PP7435_Ch1-<br>0439/DSE4             | ATGTCATTCTCTTCCAACGTGCCACAACCTT<br>TTCTTGTTGTTGGTTCTGTTGACCAATATA<br>GTCAGTGGA                            |
| CCA40103.1                                                             | PP7435_Ch3-<br>1160/EPX1             | ATGAAGCTCTCCACCAATTTGATTCTAGCT<br>ATTGCAGCAGCTTCCGCCGTTGTCTCAGCT                                          |
| CCA38524.1                                                             | PP7435_Ch2-<br>0842/EXG1             | ATGGGTGTCAACCTCGGTGGATGGCTGGT<br>TTTGGAGCCCTATATCACC                                                      |
| CCA37962.1                                                             | PP7435_Ch2-<br>0267/FLO11            | ATGGTTTCACTGCGATCGATATTCACCTCT<br>TCTATCTTAGCTGCAGGTCTGACAAGAGCT<br>CATGGA                                |
| CCA37505.1                                                             | PP7435_Ch1-<br>1389/FLO5-1           | ATGTTTGAGAAGAGTAAATTTGTGGTTTCG<br>TTTCTGCTTTTACTGCAGCTATTTTGTGTCC<br>TTGGTGTACATGGA                       |
| CCA38992.1                                                             | PP7435_Ch3-<br>0018/FPR2             | ATGAAAGTTTCTACGACCAAATTTCTGGCT<br>GTGTTCTTATTAGTTAGACTCGTTTGCGCT                                          |
| CCA36391.1                                                             | PP7435_Ch1-<br>0229/GAS1-1           | ATGTTTAAATCTCTGTGCATGTTAATAGGA<br>TCCTGCCTATTGAGTTCAGTCTTGGCA                                             |
| CCA37670.1                                                             | PP7435_Ch1-<br>1559/GAS3             | ATGAACTACTCTTACCATTATTGACACTC<br>GTTGCTGTTGCTAAGGCC                                                       |
| CAH244875<br>4.1                                                       | PP7435_Ch2-<br>1167/KAR2             | ATGCTGTCGTTAAAACCATCTTGGCTGACT<br>TTGGCGGCATTAATGTATGCCATGCTATTG<br>GTCGTAGTGCCATTTGCTAAACCTGTTAGA<br>GCT |
| CCA36444.1                                                             | PP7435_Ch1-<br>0283/MSB2             | ATGATTAATTTAAACTCCTTTCTTATACTT<br>ACAGTAACACTGTTATCTCCAGCTTTGGCA                                          |
| CCA40283.1                                                             | PP7435_Ch4-<br>0107/PDI1             | ATGCAATTCAACTGGAATATTAATACTGT<br>GGCAAGTATTTTGTCCGCTCTCACACTAGC<br>ACAAGCA                                |
| CCA39046.1                                                             | PP7435_Ch3-<br>0072/PEP4             | ATGATATTTGACGGTACTACGATGTCAATT<br>GCCATTGGTTTGCTCTCTACTCTAGGTATT<br>GGTGCTGAAGCC                          |

| <b>GenBank<br/>Accession</b> | <b>Ordered locus<br/>name / Gene<br/>name</b> | <b>Signal peptides Sequence (5'-3')</b>                                       |
|------------------------------|-----------------------------------------------|-------------------------------------------------------------------------------|
| CCA38189.1                   | PP7435_Ch2-0501/PIR1                          | ATGATGTACAGGAACTTAATAATTGCTACT<br>GCCCTTACTTGCGGTGCATACAGT                    |
| CCA40849.1                   | PP7435_Ch4-0692/PIR2                          | ATGAAGCTCGCTGCACTCTCCACTATTGCA<br>TTAACTATTTTACCCGTTGCCTTGGCT                 |
| CCA38437.1                   | PP7435_Ch2-0752                               | ATGTCTTACTTGAAAATTTCCGCTTTGCTT<br>TCAGTTTTGTCCGTCGCCTTGGCC                    |
| CCA40153.1                   | PP7435_Ch3-1213                               | ATGGAAAGCAAATACGCCGAAAAATATCA<br>AGATCGATTGATTCTTGGAGATGAT                    |
| CCA40165.1                   | PP7435_Ch3-1225                               | ATGAACCTCTTTACAATCTTAGCTTGGGGT<br>TTCCTTTATGTTCCCCTTGTA CTGGGA                |
| CCA40847.1                   | PP7435_Ch4-0690                               | ATGCAATTCAACAGTGTCTCATCAGCCA<br>ACTTTTGCTGACTCTAGCCAGTGTCTCAAT<br>GGGA        |
| CCA37069.1                   | PP7435_Ch1-0934/PRY2                          | ATGAGATTACTTCACATTTTCATTGCTATCA<br>ATTATCTCAGTATTGACCAAGGCCAACGCT             |
| CCA40496.1                   | PP7435_Ch4-0326/RCE3                          | ATGAGCACCTTGACATTGCTGGCTGTGCTG<br>TTGTCGCTTCAA AATTCAGCTCTTGCT                |
| CCA36394.1                   | PP7435_Ch1-0232/SCW10                         | ATGCAAGTTAAATCTATCGTTAACCTACTG<br>TTGGCATGTTTCGTTGGCCGTGGCC                   |
| CCA38930.1                   | PP7435_Ch2-1255/SCW11                         | ATGCTATCAACTATCTTAAATATCTTTATC<br>CTGTTGCTCTTCATACAGGCATCCCTACAG              |
| CCA37765.1                   | PP7435_Ch2-0068/SUN4                          | ATGAAGATATCCGCTCTTACAGCCTGCGCT<br>GTTACTCTAGCTGGTCTTGCAATTGCA                 |
| CCA37668.1                   | PP7435_Ch1-1557/TOS1                          | ATGAAGTTATCAGCAACCTTACTGCTCTCC<br>GTTTTCACTTCCATCCAGTCTGCCTACGCT              |
| CCA41119.1                   | PP7435_Ch4-0969/UTH1                          | ATGAAATCTCAACTTATCTTTATGGCTCTT<br>GCCTCTCTGGTGGCCTCC                          |
| CCA40555.1                   | PP7435_Ch4-0387/YPS1-1                        | ATGTTGAAGGATCAGTTCTTGTTATGGGTT<br>GCTTTGATAGCGAGCGTACCGGTTTCCGGC<br>GTGATGGCA |

## Identification results by MALDI TOF mass spectrometry:

### Supplementary Note S1 (Bovine hemoglobin) :

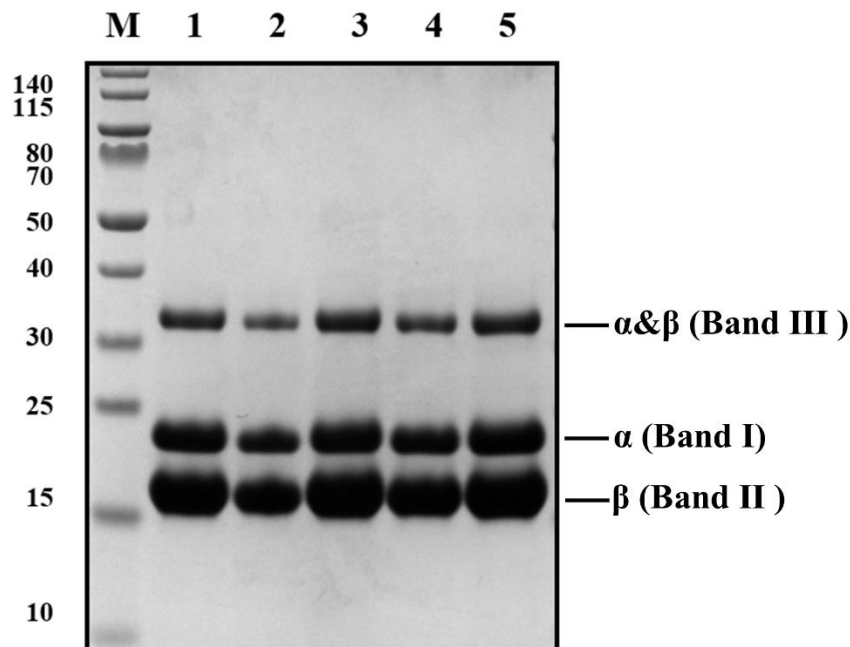

### $\alpha$ subunit (band I) :

#### **Mascot Search Results**

##### Protein View

Match to: HBA\_BOVIN Score: 392  
Hemoglobin subunit alpha OS=Bos taurus GN=HBA PE=1 SV=2  
Found in search of DATA.TXT  
  
Nominal mass ( $M_r$ ): 15175; Calculated pI value: 8.07  
NCBI BLAST search of HBA\_BOVIN against nr  
Unformatted [sequence string](#) for pasting into other applications

Taxonomy: [Bos taurus](#)

Variable modifications: Oxidation (M)  
Cleavage by Trypsin: cuts C-term side of KR unless next residue is P  
Sequence Coverage: 43%

Matched peptides shown in **Bold Red**

1 MVLSAADKGN VKAAMGK**VGG HAAEYGAEL ERMFLSFPTT KTYFPHPDLS**  
51 **HGSAQVK**GHG AKVAALTKA VEHLDDLPGA LSELSDLHAH KLRVDPVNFK  
101 LLSHSLVLTL ASHLPSDFTP AVHASLDKFL ANVSTVLTSK YR

Show predicted peptides also

Sort Peptides By ☒ Residue Number ☐ Increasing Mass ☐ Decreasing Mass

| Start - End | Observed  | Mr (expt) | Mr (calc) | ppm | Miss | Sequence                                                       |
|-------------|-----------|-----------|-----------|-----|------|----------------------------------------------------------------|
| 18 - 32     | 1529.8895 | 1528.8822 | 1528.7270 | 102 | 0    | K.VGGHAAEYGAELER.M ( <a href="#">Ions score 146</a> )          |
| 42 - 57     | 1834.0401 | 1833.0328 | 1832.8846 | 81  | 0    | K.TYFPHPDLSHGSAQVK.G ( <a href="#">Ions score 137</a> )        |
| 70 - 91     | 2367.4196 | 2366.4124 | 2366.1866 | 95  | 0    | K.AVEHLDDLFGALSELSDLHAHK.L ( <a href="#">Ions score 59</a> )   |
| 70 - 93     | 2636.6311 | 2635.6239 | 2635.3718 | 96  | 1    | K.AVEHLDDLFGALSELSDLHAHKLR.V ( <a href="#">Ions score 36</a> ) |
| 92 - 100    | 1087.7322 | 1086.7249 | 1086.6186 | 98  | 1    | K.LRVDPVNFK.L ( <a href="#">Ions score 16</a> )                |

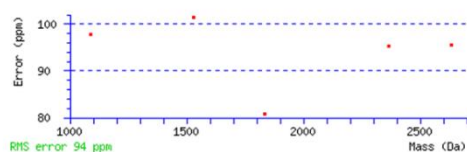

β subunit (band II) :

*MATRIX*  
*SCIENCE* Mascot Search Results

Protein View

Match to: HBB\_BOVIN Score: 476  
Hemoglobin subunit beta OS=Bos taurus GN=HBB PE=1 SV=1  
Found in search of DATA.TXT

Nominal mass (M<sub>0</sub>): 15944; Calculated pI value: 7.01  
NCBI BLAST search of HBB\_BOVIN against nr  
Unformatted [sequence string](#) for pasting into other applications

Taxonomy: [Bos taurus](#)

Variable modifications: Oxidation (M)  
Cleavage by Trypsin: cuts C-term side of KR unless next residue is P  
Sequence Coverage: 55%

Matched peptides shown in **Bold Red**

1 MLTAEKAAV TAFWGW**KVVD** EVGGEALGRL LVVYPWTQRF FESFGDLSTA  
51 **DAVMNNPK**VK AHGKKVLDSF SNGMKHLDDL KGTFALSEL HCDKLHVDPE  
101 NFK**LLGNVLV** VVLAR**NFGKE** FTFVLQADFQ KVVAGVANAL AHRYH

Show predicted peptides also

Sort Peptides By ☒ Residue Number ☐ Increasing Mass ☐ Decreasing Mass

| Start - End | Observed  | Mr(expt)  | Mr(calc)  | ppm | Miss | Sequence                                                                 |
|-------------|-----------|-----------|-----------|-----|------|--------------------------------------------------------------------------|
| 17 - 29     | 1328.8744 | 1327.8672 | 1327.7096 | 119 | 1    | K.VKVDEVGGEALGR.L ( <a href="#">Ions score 74</a> )                      |
| 30 - 39     | 1274.8781 | 1273.8708 | 1273.7183 | 120 | 0    | R.LLVVYPWTQR.F ( <a href="#">Ions score 70</a> )                         |
| 40 - 58     | 2106.1250 | 2105.1177 | 2104.9412 | 84  | 0    | R.FFESFGDLSTADAVMNNPK.V Oxidation (M) ( <a href="#">Ions score 125</a> ) |
| 104 - 115   | 1265.9078 | 1264.9005 | 1264.8231 | 61  | 0    | K.LLGNVLVVVLAR.N ( <a href="#">Ions score 15</a> )                       |
| 120 - 131   | 1422.8601 | 1421.8529 | 1421.7191 | 94  | 0    | K.EFTFVLQADFQK.V ( <a href="#">Ions score 83</a> )                       |
| 132 - 143   | 1177.7919 | 1176.7846 | 1176.6727 | 95  | 0    | K.VVAGVANALAHRY.Y ( <a href="#">Ions score 69</a> )                      |
| 132 - 145   | 1477.9467 | 1476.9395 | 1476.7950 | 98  | 1    | K.VVAGVANALAHRYH.- ( <a href="#">Ions score 42</a> )                     |

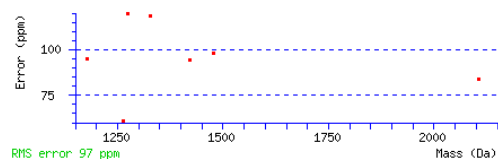

# $\alpha$ - and $\beta$ -subunit dimers (band III):

## Mascot Search Results

### Protein View

Match to: HBA\_BOVIN Score: 134  
Hemoglobin subunit alpha OS=Bos taurus GN=HBA PE=1 SV=2  
Found in search of DATA.TXT  
  
Nominal mass ( $M_r$ ): 15175; Calculated pI value: 8.07  
NCBI BLAST search of [HBA\\_BOVIN](#) against nr  
Unformatted [sequence string](#) for pasting into other applications

Taxonomy: [Bos taurus](#)

Variable modifications: Oxidation (M)  
Cleavage by Trypsin: cuts C-term side of KR unless next residue is P  
Sequence Coverage: 26%

Matched peptides shown in **Bold Red**

1 MVLSAADKGN VKAANGK**VGG HAAEYGAEL ERMFLSFPTI** KTYFPHFDLS  
51 HGSAQVKGHG AKVAAAL**KA VEHLDDLPGA LSELSDLHAH** KLRVDPVNFK  
101 LLSHSLVTL ASHLPSDFTP AVHASLDKFL ANVSTVLTSK YR

Show predicted peptides also

Sort Peptides By ☒ Residue Number ☐ Increasing Mass ☐ Decreasing Mass

| Start - End | Observed  | Mr(expt)  | Mr(calc)  | ppm | Miss | Sequence                                                     |
|-------------|-----------|-----------|-----------|-----|------|--------------------------------------------------------------|
| 18 - 32     | 1529.8687 | 1528.8614 | 1528.7270 | 88  | 0    | K.VGGHAAEYGAELER.M ( <a href="#">Ions score 63</a> )         |
| 70 - 91     | 2367.3631 | 2366.3558 | 2366.1866 | 72  | 0    | K.AVEHLDDLPGALSELSDLHAHK.L ( <a href="#">Ions score 71</a> ) |

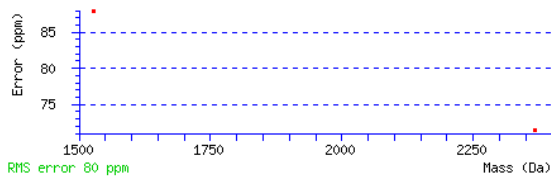

## Mascot Search Results

### Protein View

Match to: HBB\_BOVIN Score: 535  
Hemoglobin subunit beta OS=Bos taurus GN=HBB PE=1 SV=1  
Found in search of DATA.TXT  
  
Nominal mass ( $M_r$ ): 15944; Calculated pI value: 7.01  
NCBI BLAST search of [HBB\\_BOVIN](#) against nr  
Unformatted [sequence string](#) for pasting into other applications

Taxonomy: [Bos taurus](#)

Variable modifications: Oxidation (M)  
Cleavage by Trypsin: cuts C-term side of KR unless next residue is P  
Sequence Coverage: 49%

Matched peptides shown in **Bold Red**

1 MLTAEKKAIV TAFWGK**VKVD EVGGEALGR L LVVYPWQRF FESFGDLSTA**  
51 **DAVMNPKVK** AHGKKVLDSE SNGMKHLDDL KGTFALSEL HCDKLHVDPE  
101 NFKLLGNVLV VVLARN**PKKE FTFVLQADFQ KVVAGVANAL AHRYH**

Show predicted peptides also

Sort Peptides By ☒ Residue Number ☐ Increasing Mass ☐ Decreasing Mass

| Start - End | Observed  | Mr(expt)  | Mr(calc)  | ppm | Miss | Sequence                                                                 |
|-------------|-----------|-----------|-----------|-----|------|--------------------------------------------------------------------------|
| 17 - 29     | 1328.8416 | 1327.8344 | 1327.7096 | 94  | 1    | K.VKVDEVGGEALGR.L ( <a href="#">Ions score 60</a> )                      |
| 30 - 39     | 1274.8368 | 1273.8295 | 1273.7183 | 87  | 0    | R.LLVVYEWQRF.F ( <a href="#">Ions score 70</a> )                         |
| 40 - 58     | 2106.0916 | 2105.0844 | 2104.9412 | 68  | 0    | R.FFESFGDLSTADAVMNNPK.V Oxidation (M) ( <a href="#">Ions score 150</a> ) |
| 116 - 131   | 1869.0573 | 1868.0501 | 1867.9469 | 55  | 1    | R.NFGKEFTFVLQADFQK.V ( <a href="#">Ions score 146</a> )                  |
| 132 - 143   | 1177.7877 | 1176.7805 | 1176.6727 | 92  | 0    | K.VVAGVANALAHRY.Y ( <a href="#">Ions score 72</a> )                      |
| 132 - 145   | 1477.9265 | 1476.9192 | 1476.7950 | 84  | 1    | K.VVAGVANALAHRYH.- ( <a href="#">Ions score 39</a> )                     |

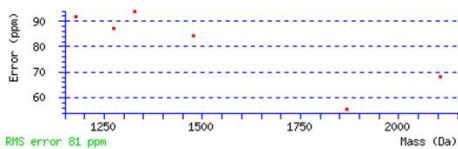

Supplementary Note S2 (Human hemoglobin) :

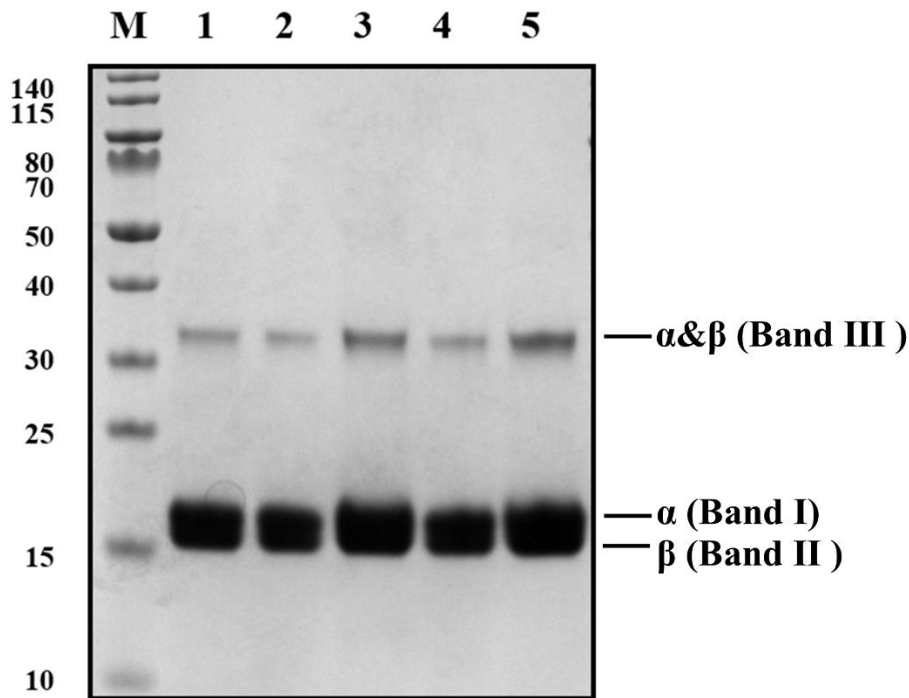

$\alpha$  subunit (band I) :

*MATRIX* SCIENCE Mascot Search Results

Protein View

Match to: HBA\_HUMAN Score: 181  
Hemoglobin subunit alpha OS=Homo sapiens GN=HBA1 PE=1 SV=2  
Found in search of DATA.TXT

Nominal mass ( $M_r$ ): 15248; Calculated pI value: 8.72  
NCBI BLAST search of [HBA\\_HUMAN](#) against nr  
Unformatted [sequence string](#) for pasting into other applications

Taxonomy: [Homo sapiens](#)

Variable modifications: Oxidation (M)  
Cleavage by Trypsin: cuts C-term side of KR unless next residue is P  
Sequence Coverage: 16%

Matched peptides shown in **Bold Red**

1 MVLSPADKTN VKAANGK**VGA HAGEYGAEAL ERMFLSFPTT** KTYFPFHDL  
51 HGSAQVKGHG KKVADALINA VAHVDDMPNA LSALSDLHAH KLRVDPVNF  
101 LLSHCLLVTL AAHLPAEFTP AVHASLDKFL ASVSTVLTSK YR

Show predicted peptides also

Sort Peptides By ☒ Residue Number ☐ Increasing Mass ☐ Decreasing Mass

| Start - End | Observed  | Mr (expt) | Mr (calc) | ppm | Miss | Sequence                                                             |
|-------------|-----------|-----------|-----------|-----|------|----------------------------------------------------------------------|
| 18 - 32     | 1529.9228 | 1528.9155 | 1528.7270 | 123 | 0    | <b>K.VGAHAGEYGAEALER.M</b> ( <a href="#">Ions score 149</a> )        |
| 33 - 41     | 1087.7585 | 1086.7512 | 1086.5420 | 193 | 0    | <b>R.MFLSFPTTK.T</b> Oxidation (M) ( <a href="#">Ions score 33</a> ) |

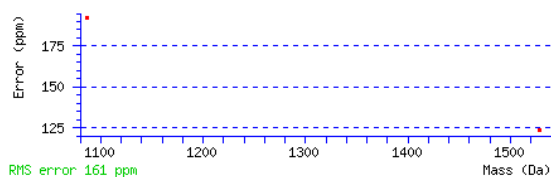

β subunit (band II) :

*MATRIX*  
*SCIENCE* Mascot Search Results

Protein View

Match to: **HBB HUMAN** Score: 337  
Hemoglobin subunit beta OS=Homo sapiens GN=HBB PE=1 SV=2  
Found in search of DATA.TXT  
  
Nominal mass (M<sub>r</sub>): 15988; Calculated pI value: 6.75  
NCBI BLAST search of **HBB HUMAN** against nr  
Unformatted [sequence string](#) for pasting into other applications

Taxonomy: [Homo sapiens](#)

Variable modifications: Oxidation (M)  
Cleavage by Trypsin: cuts C-term side of KR unless next residue is P  
Sequence Coverage: 39%

Matched peptides shown in **Bold Red**

1 MVHLIPEERS AVTALWGK**VN VDEVGGEALG RLIVVYPWTQ RPFESFGDLS**  
51 **TPDAVMGNPK** VKAHGKK**VLG AFS**DGLAHL**D NLK**GTIFATLS ELHCDKLHVD  
101 PENFRLLGNV LVCVLAHHFG KEFTPPVQAA YQKVVGAVAN ALAHKYH

Show predicted peptides also

Sort Peptides By ☒ Residue Number ☐ Increasing Mass ☐ Decreasing Mass

| Start | End | Observed  | Mr(expt)  | Mr(calc)  | ppm | Miss | Sequence                                                                 |
|-------|-----|-----------|-----------|-----------|-----|------|--------------------------------------------------------------------------|
| 19    | 31  | 1314.7860 | 1313.7788 | 1313.6575 | 92  | 0    | K.VNVDEVGGEALGR.L ( <a href="#">Ions score 51</a> )                      |
| 32    | 41  | 1274.8401 | 1273.8328 | 1273.7183 | 90  | 0    | R.LLVVYPWTQR.F ( <a href="#">Ions score 40</a> )                         |
| 42    | 60  | 2075.0712 | 2074.0640 | 2073.9354 | 62  | 0    | R.FFESFGDLSTPDAVMGNPK.V Oxidation (M) ( <a href="#">Ions score 132</a> ) |
| 68    | 83  | 1670.0154 | 1669.0082 | 1668.8835 | 75  | 0    | K.VLGAFSDGLAHLDNLK.G ( <a href="#">Ions score 114</a> )                  |

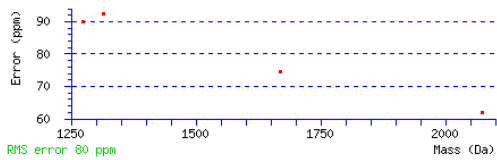

$\alpha$ - and  $\beta$ -subunit dimers (band III) :

**Mascot Search Results**

**Protein View**

Match to: **HBA\_HUMAN** Score: 100  
Hemoglobin subunit alpha OS=Homo sapiens GN=HBA1 PE=1 SV=2  
Found in search of DATA.TXT

Nominal mass ( $M_r$ ): 15248; Calculated pI value: 8.72  
NCBI BLAST search of **HBA\_HUMAN** against nr  
Unformatted [sequence string](#) for pasting into other applications

Taxonomy: [Homo sapiens](#)

Variable modifications: Oxidation (M)  
Cleavage by Trypsin: cuts C-term side of KR unless next residue is P  
Sequence Coverage: 10%

Matched peptides shown in **Bold Red**

1 MVLSPADKTN VKAANGK**VGA HAGEYGAEAL ERMFLSFPTT** KTYFPHFDLS  
51 HGSAQVKGHG KKVADALTNA VAHVDDMPNA LSALS~~DL~~HAH KLRVDPVNFK  
101 LLSHCLLVIL AAHLPAEFTP AVHASL~~DK~~FL ASVSTVLT~~SK~~ YR

Show predicted peptides also

Sort Peptides By ☒ Residue Number ☐ Increasing Mass ☐ Decreasing Mass

| Start - End | Observed  | Mr(expt)  | Mr(calc)  | ppm | Miss | Sequence            |                                    |
|-------------|-----------|-----------|-----------|-----|------|---------------------|------------------------------------|
| 18 - 32     | 1529.8631 | 1528.8558 | 1528.7270 | 84  | 0    | K.VGAHAGEYGAEALER.M | ( <a href="#">Ions score 100</a> ) |

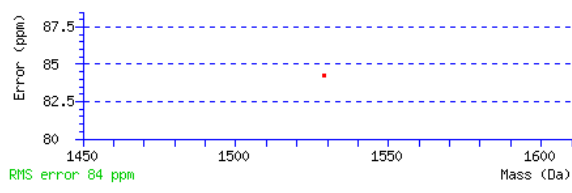

**Mascot Search Results**

**Protein View**

Match to: **HBB\_HUMAN** Score: 299  
Hemoglobin subunit beta OS=Homo sapiens GN=HBB PE=1 SV=2  
Found in search of DATA.TXT

Nominal mass ( $M_r$ ): 15988; Calculated pI value: 6.75  
NCBI BLAST search of **HBB\_HUMAN** against nr  
Unformatted [sequence string](#) for pasting into other applications

Taxonomy: [Homo sapiens](#)

Variable modifications: Oxidation (M)  
Cleavage by Trypsin: cuts C-term side of KR unless next residue is P  
Sequence Coverage: 34%

Matched peptides shown in **Bold Red**

1 MVHLIPEEKS AVTALWGK**VN VDEVGGEALG RLIVVYPTQ RPFESFGDLS**  
51 **TPDAVMGNPK** VKAHGKKVLG AFSDGLAHL~~D~~ NLKGTIFATLS ELHCDK~~L~~HVD  
101 **PENFRLLGNV** LVCVLAHHFG KEFTFPVQAA YQKVVGAVAN ALAHKYH

Show predicted peptides also

Sort Peptides By ☒ Residue Number ☐ Increasing Mass ☐ Decreasing Mass

| Start - End | Observed  | Mr(expt)  | Mr(calc)  | ppm | Miss | Sequence                |                                                  |
|-------------|-----------|-----------|-----------|-----|------|-------------------------|--------------------------------------------------|
| 19 - 31     | 1314.8430 | 1313.8358 | 1313.6575 | 136 | 0    | K.VNVDEVGGEALGR.L       | ( <a href="#">Ions score 107</a> )               |
| 32 - 41     | 1274.8947 | 1273.8874 | 1273.7183 | 133 | 0    | R.LLIVVYPTQR.F          | ( <a href="#">Ions score 27</a> )                |
| 42 - 60     | 2075.1549 | 2074.1476 | 2073.9354 | 102 | 0    | R.PFESFGDLSTPDAVMGNPK.V | Oxidation (M) ( <a href="#">Ions score 144</a> ) |
| 97 - 105    | 1126.7309 | 1125.7237 | 1125.5567 | 148 | 0    | K.LHVDPENFR.L           | ( <a href="#">Ions score 22</a> )                |

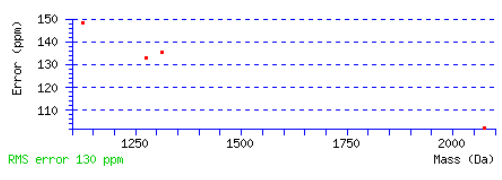



Supplementary Note S3 (Porcine hemoglobin) :

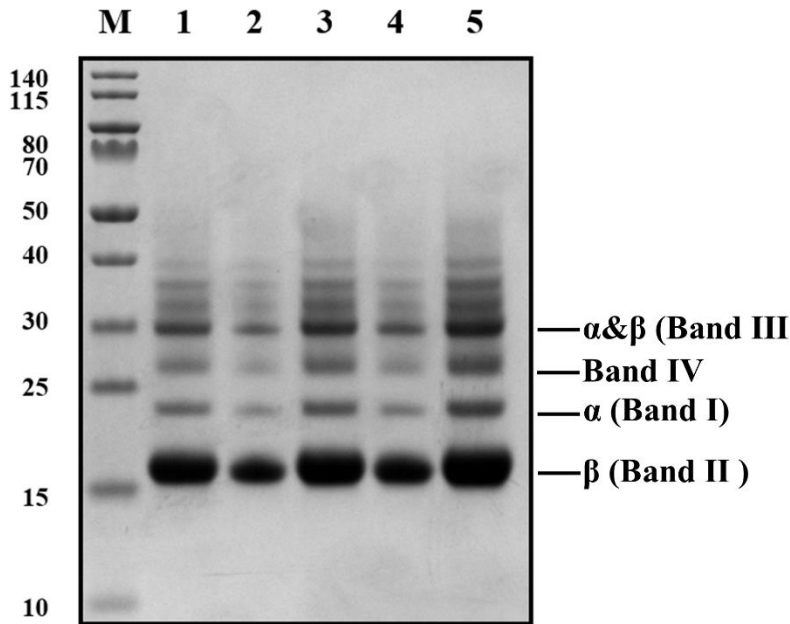

$\alpha$  subunit (band I) :

**Mascot Search Results**

Protein View

Match to: HBA\_PIG Score: 117  
Hemoglobin subunit alpha OS=Sus scrofa GN=HBA PE=1 SV=1  
Found in search of DATA.TXT  
  
Nominal mass ( $M_r$ ): 15030; Calculated pI value: 8.76  
NCBI BLAST search of HBA\_PIG against nr  
Unformatted [sequence string](#) for pasting into other applications

Taxonomy: [Sus scrofa](#)

Variable modifications: Oxidation (M)  
Cleavage by Trypsin: cuts C-term side of KR unless next residue is P  
Sequence Coverage: 21%

Matched peptides shown in **Bold Red**

1 VLSAADKANV KAANGK**VGGQ** AGAHGAEALE RMFLGFPTIK **TYFPHFNL**SH  
51 **GSDQVK**AHGQ KVADALTKAV GHLDLPGAL SALSDLHAHK LRVDPVNFKL  
101 LSHCLLVTLA AHPDDFNPS VHASLDKFLA NVSTVLTSKY R

Show predicted peptides also

Sort Peptides By ☒ Residue Number ☐ Increasing Mass ☐ Decreasing Mass

| Start | End | Observed  | Mr (expt) | Mr (calc) | ppm  | Miss | Sequence             |                                    |
|-------|-----|-----------|-----------|-----------|------|------|----------------------|------------------------------------|
| 17    | 31  | 1422.5649 | 1421.5576 | 1421.7011 | -101 | 0    | K.VGGQAGAHGAEALER.M  | ( <a href="#">Ions score 6</a> )   |
| 41    | 56  | 1876.8530 | 1875.8457 | 1875.8904 | -24  | 0    | K.TYFPHFNLHSGSDQVK.A | ( <a href="#">Ions score 111</a> ) |

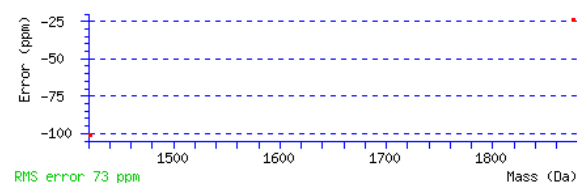

β subunit (band II) :

*MATRIX* Mascot Search Results

Protein View

Match to: HBB\_PIG Score: 519  
Hemoglobin subunit beta OS=Sus scrofa GN=HBB PE=1 SV=3  
Found in search of DATA.TXT

Nominal mass (M<sub>0</sub>): 16155; Calculated pI value: 7.10  
NCBI BLAST search of HBB\_PIG against nr  
Unformatted [sequence string](#) for pasting into other applications

Taxonomy: [Sus scrofa](#)

Variable modifications: Oxidation (M)  
Cleavage by Trypsin: cuts C-term side of KR unless next residue is P  
Sequence Coverage: 53%

Matched peptides shown in **Bold Red**

1 MVHLSAEKE **AVLGLWGRVN VDEVGGEALG RLLVVYPWTQ RFFESPGDLS**  
51 **NADAVMGMPK** VKAHGKKVLQ SFSDGLKHLN NLKGTFAKLS ELHCDQLHVD  
101 PENFR**LLGNV IVVVLARRLG HDFNPNVQAA FQKVVAGVAN** ALAHKYH

Show predicted peptides also

Sort Peptides By ☒ Residue Number ☐ Increasing Mass ☐ Decreasing Mass

| Start | End | Observed  | Mr (expt) | Mr (calc) | ppm | Miss | Sequence                                                                  |
|-------|-----|-----------|-----------|-----------|-----|------|---------------------------------------------------------------------------|
| 10    | 31  | 2268.0784 | 2267.0711 | 2267.1910 | -53 | 1    | K.EAVLGLWGRKVVNDEVGGEALGR.L ( <a href="#">Ions score 187</a> )            |
| 19    | 31  | 1314.5954 | 1313.5881 | 1313.6575 | -53 | 0    | K.VNVDEVGGEALGR.L ( <a href="#">Ions score 26</a> )                       |
| 32    | 41  | 1274.6478 | 1273.6405 | 1273.7183 | -61 | 0    | R.LLVVYPWTQR.F ( <a href="#">Ions score 44</a> )                          |
| 42    | 60  | 2045.7775 | 2044.7702 | 2044.9200 | -73 | 0    | R.RFFESPGDLSNADAVMGMPK.V ( <a href="#">Ions score 77</a> )                |
| 42    | 60  | 2061.7795 | 2060.7722 | 2060.9150 | -69 | 0    | R.RFFESPGDLSNADAVMGMPK.V Oxidation (M) ( <a href="#">Ions score 109</a> ) |
| 106   | 117 | 1265.7430 | 1264.7358 | 1264.8231 | -69 | 0    | R.LLGNVIVVVLAR.R ( <a href="#">Ions score 14</a> )                        |
| 118   | 133 | 1841.8260 | 1840.8188 | 1840.9333 | -62 | 1    | R.RLGHDFNPNVQAAFQK.V ( <a href="#">Ions score 52</a> )                    |
| 119   | 133 | 1685.7258 | 1684.7186 | 1684.8322 | -67 | 0    | R.RLGHDFNPNVQAAFQK.V ( <a href="#">Ions score 117</a> )                   |

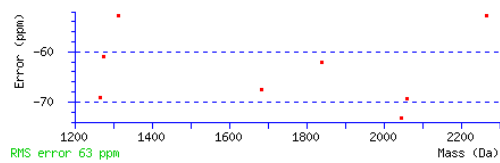

# $\alpha$ - and $\beta$ -subunit dimers (band III) :

## *{MATRIX}* *{SCIENCE}* Mascot Search Results

### Protein View

Match to: HBA\_PIG Score: 179  
Hemoglobin subunit alpha OS=Sus scrofa GN=HBA PE=1 SV=1  
Found in search of DATA.TXT

Nominal mass ( $M_r$ ): 15030; Calculated pI value: 8.76  
NCBI BLAST search of [HBA\\_PIG](#) against nr  
Unformatted [sequence string](#) for pasting into other applications

Taxonomy: [Sus scrofa](#)

Variable modifications: Oxidation (M)  
Cleavage by Trypsin: cuts C-term side of KR unless next residue is P  
Sequence Coverage: 26%

Matched peptides shown in **Bold Red**

1 VLSAADKANV KAANGK**VGGQ** AGAHGAEALE RMFLGFPTIK TYFPFNLISH  
51 GSDQVKAHGQ KVADALTK**AV** GHLLDLPAL SALSDLHAHK LRVDPVNFKL  
101 LSHCLLVTLA AHHPDDFNPS VHASLDKFLA NVSTVLISKY R

Show predicted peptides also

Sort Peptides By

☒ Residue Number ☐ Increasing Mass ☐ Decreasing Mass

| Start - End | Observed  | Mr (expt) | Mr (calc) | ppm | Miss | Sequence                                                        |
|-------------|-----------|-----------|-----------|-----|------|-----------------------------------------------------------------|
| 17 - 31     | 1422.6097 | 1421.6025 | 1421.7011 | -69 | 0    | K.VGGQAGAHGAEALER.M ( <a href="#">Ions score 55</a> )           |
| 69 - 90     | 2237.0081 | 2236.0008 | 2236.1600 | -71 | 0    | K.AVGHLLDLPALGALSALSDLHAHK.L ( <a href="#">Ions score 125</a> ) |

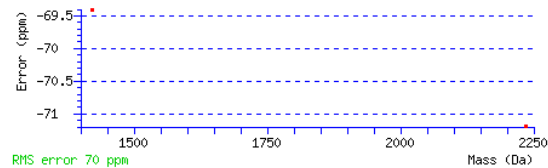

## *{MATRIX}* *{SCIENCE}* Mascot Search Results

### Protein View

Match to: HBB\_PIG Score: 444  
Hemoglobin subunit beta OS=Sus scrofa GN=HBB PE=1 SV=3  
Found in search of DATA.TXT

Nominal mass ( $M_r$ ): 16155; Calculated pI value: 7.10  
NCBI BLAST search of [HBB\\_PIG](#) against nr  
Unformatted [sequence string](#) for pasting into other applications

Taxonomy: [Sus scrofa](#)

Variable modifications: Oxidation (M)  
Cleavage by Trypsin: cuts C-term side of KR unless next residue is P  
Sequence Coverage: 45%

Matched peptides shown in **Bold Red**

1 MVHLSAEKE AVLGWLGRVN VDEVGGEALG RLLVVYPWTQ RFFESFGDLS  
51 **NADAVMGNPK** VKAHGKKVLQ SFSDGLKHLN NLKGIFAKLS ELHCDQLHVD  
101 PENFRLLGNV IVVVLAR**RLG** **HDFNPNVQAA** **FQK**VVAGVAN ALAHKYH

Show predicted peptides also

Sort Peptides By

☒ Residue Number ☐ Increasing Mass ☐ Decreasing Mass

| Start - End | Observed  | Mr (expt) | Mr (calc) | ppm | Miss | Sequence                                                                |
|-------------|-----------|-----------|-----------|-----|------|-------------------------------------------------------------------------|
| 10 - 31     | 2268.3602 | 2267.3529 | 2267.1910 | 71  | 1    | K.EAVLGLWGRVNVDEVGGEALGR.L ( <a href="#">Ions score 141</a> )           |
| 19 - 31     | 1314.8043 | 1313.7970 | 1313.6575 | 106 | 0    | K.VNVDEVGGEALGR.L ( <a href="#">Ions score 40</a> )                     |
| 32 - 41     | 1274.8482 | 1273.8410 | 1273.7183 | 96  | 0    | R.LLVVYPWTQR.F ( <a href="#">Ions score 75</a> )                        |
| 42 - 60     | 2062.0455 | 2061.0382 | 2060.9150 | 60  | 0    | R.FFESFGDLSNADAVMGNPK.V Oxidation (M) ( <a href="#">Ions score 94</a> ) |
| 118 - 133   | 1842.0662 | 1841.0589 | 1840.9333 | 68  | 1    | R.RLGHDFFNPNVQAAPQK.V ( <a href="#">Ions score 94</a> )                 |

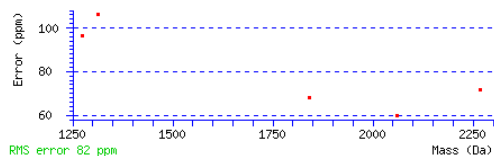

band IV:

**Mascot Search Results**

Protein View

Match to: **HBA\_PIG** Score: 45  
Hemoglobin subunit alpha OS=Sus scrofa GN=HBA PE=1 SV=1  
Found in search of DATA.TXT  
  
Nominal mass (M<sub>r</sub>): 15030; Calculated pI value: 8.76  
NCBI BLAST search of **HBA\_PIG** against nr  
Unformatted [sequence string](#) for pasting into other applications

Taxonomy: [Sus scrofa](#)  
  
Variable modifications: Oxidation (M)  
Cleavage by Trypsin: cuts C-term side of KR unless next residue is P  
Sequence Coverage: 10%

Matched peptides shown in **Bold Red**

1 VLSAADKANV KAAWG**KVGGQ AGAHGAEALE** RMFLGFPTTK TYFPHFNLSH  
51 GSDQVKAHGQ KVADALTKAV GHLDLPGAL SALSDLHAHK LRVDPVNFKL  
101 LSHCLLVTLA AHHPDDFNPS VHASLDKFLA NVSTVLTSKY R

Show predicted peptides also

Sort Peptides By ☒ Residue Number ☐ Increasing Mass ☐ Decreasing Mass

| Start - End | Observed  | Mr(expt)  | Mr(calc)  | ppm | Miss | Sequence            |                                   |
|-------------|-----------|-----------|-----------|-----|------|---------------------|-----------------------------------|
| 17 - 31     | 1422.8680 | 1421.8607 | 1421.7011 | 112 | 0    | K.VGGQAGAHGAEALER.M | ( <a href="#">Ions score 45</a> ) |

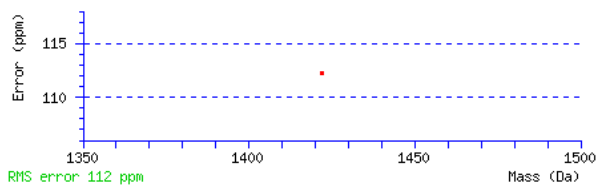

**Mascot Search Results**

Protein View

Match to: **HBB\_PIG** Score: 160  
Hemoglobin subunit beta OS=Sus scrofa GN=HBB PE=1 SV=3  
Found in search of DATA.TXT  
  
Nominal mass (M<sub>r</sub>): 16155; Calculated pI value: 7.10  
NCBI BLAST search of **HBB\_PIG** against nr  
Unformatted [sequence string](#) for pasting into other applications

Taxonomy: [Sus scrofa](#)  
  
Variable modifications: Oxidation (M)  
Cleavage by Trypsin: cuts C-term side of KR unless next residue is P  
Sequence Coverage: 23%

Matched peptides shown in **Bold Red**

1 MVHLSAEEKE AVLGWLWGKVN VDEVGGEALG RLLVVPWTQ **RFFESFGDLS**  
51 **NADAVMGNPK** VKAHGKKVLQ SFSDGLKHLD NLKGTFAKLS ELHCDQLHVD  
101 PENFRLLGNV IVVVLAR**RLG HDPNPNVQAA FQK**VVAGVAN ALAHKYH

Show predicted peptides also

Sort Peptides By ☒ Residue Number ☐ Increasing Mass ☐ Decreasing Mass

| Start - End | Observed  | Mr(expt)  | Mr(calc)  | ppm | Miss | Sequence                |                                                  |
|-------------|-----------|-----------|-----------|-----|------|-------------------------|--------------------------------------------------|
| 42 - 60     | 2061.7639 | 2060.7567 | 2060.9150 | -77 | 0    | R.FFESFGDLSNADAVMGNPK.V | Oxidation (M) ( <a href="#">Ions score 123</a> ) |
| 118 - 133   | 1841.8206 | 1840.8134 | 1840.9333 | -65 | 1    | R.RLGHDNPNVQAAFQK.V     | ( <a href="#">Ions score 37</a> )                |

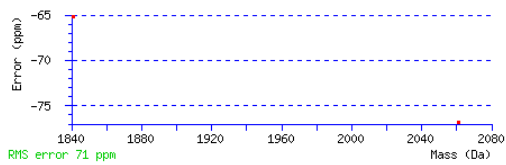

## Supplementary References

1. Liu, Q.; Shi, X.; Song, L.; Liu, H.; Zhou, X.; Wang, Q.; Zhang, Y.; Cai, M. CRISPR–Cas9-mediated genomic multiloci integration in *Pichia pastoris*. *Microb. Cell. Fact.* **2019**, *18*, 144.
2. Yu, F.; Zhao, X.; Zhou, J.; Lu, W.; Li, J.; Chen, J.; Du, G. Biosynthesis of high-active hemoproteins by the efficient heme-supply *Pichia pastoris* chassis. *Adv. Sci.* **2023**, *10*, 2302826.
3. Burgard, J.; Grünwald-Gruber, C.; Altmann, F.; Zanghellini, J.; Valli, M.; Mattanovich, D.; Gasser, B. The secretome of *Pichia pastoris* in fed-batch cultivations is largely independent of the carbon source but changes quantitatively over cultivation time. *Microb. Biotechnol.* **2020**, *13*, 479-494.
